# Supplementary material for: PM2.5 promotes lung cancer progression through activation of the AhR‐TMPRSS2‐IL18 pathway
Source: PubMed Central journal article supplement (PMC10245036; doi:10.15252/emmm.202217014), 2023-03-28
Supplement: EMMM-15-e17014-s003.pdf [file EMMM-15-e17014-s003.pdf]

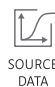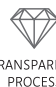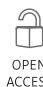

# PM2.5 promotes lung cancer progression through activation of the AhR-TMPRSS2-IL18 pathway

Tong-Hong Wang<sup>1,2,3,4,†</sup> , Kuo-Yen Huang<sup>5,†</sup> , Chin-Chuan Chen<sup>1,4</sup>, Ya-Hsuan Chang<sup>6</sup>, Hsuan-Yu Chen<sup>6</sup>, Chuen Hsueh<sup>1,7</sup>, Yi-Tsen Liu<sup>2</sup>, Shuenn-Chen Yang<sup>8</sup>, Pan-Chyr Yang<sup>8,9,10,\*</sup> & Chi-Yuan Chen<sup>1,2,\*\*</sup>

## Abstract

Particulate matter 2.5 (PM2.5) is a risk factor for lung cancer. In this study, we investigated the molecular mechanisms of PM2.5 exposure on lung cancer progression. We found that short-term exposure to PM2.5 for 24 h activated the EGFR pathway in lung cancer cells (EGFR wild-type and mutant), while long-term exposure of lung cancer cells to PM2.5 for 90 days persistently promoted EGFR activation, cell proliferation, anchorage-independent growth, and tumor growth in a xenograft mouse model in EGFR-driven H1975 cancer cells. We showed that PM2.5 activated AhR to translocate into the nucleus and promoted EGFR activation. AhR further interacted with the promoter of TMPRSS2, thereby upregulating TMPRSS2 and IL18 expression to promote cancer progression. Depletion of TMPRSS2 in lung cancer cells suppressed anchorage-independent growth and xenograft tumor growth in mice. The expression levels of TMPRSS2 were found to correlate with nuclear AhR expression and with cancer stage in lung cancer patient tissue. Long-term exposure to PM2.5 could promote tumor progression in lung cancer through activation of EGFR and AhR to enhance the TMPRSS2-IL18 pathway.

**Keywords** AhR; EGFR; lung cancer; PM2.5; TMPRSS2

**Subject Categories** Cancer; Respiratory System

**DOI** 10.15252/emmm.202217014 | Received 10 October 2022 | Revised 10 March 2023 | Accepted 14 March 2023 | Published online 28 March 2023

**EMBO Mol Med (2023) 15: e17014**

## Introduction

Air pollution is contamination of the indoor or outdoor atmosphere by chemical, physical, or biological agents, and is one of the greatest environmental risks to human health. The combined effects of ambient (outdoor) and household air pollution were estimated by World Health Organization (WHO) to cause about 7 million premature deaths every year (Pérez Velasco & Jarosińska, 2022). The major components of air pollution are particulate matter (PM). Short-term or long-term exposure to PM is known to cause adverse health effects, including cardiovascular and respiratory disease, and cancers (Bazyar *et al.*, 2019).

Particulate matter can be divided into PM10 or PM2.5 depending on whether the diameter of the PM particles is less than 10 or 2.5  $\mu\text{m}$ . PM10 is mostly deposited in the nasal cavity and upper respiratory tract, while PM2.5 can enter the lower respiratory tract into the alveoli and enter the bloodstream (Sicard *et al.*, 2019). PM2.5 enters the human body mainly through inhalation, thus causing various pathological effects on the respiratory system, such as chronic obstructive pulmonary disease, asthma, and multidrug resistance after tuberculosis treatment (Xing *et al.*, 2016; Jeong *et al.*, 2019; Yao *et al.*, 2019). PM2.5 is composed of inorganic, organic, and biological compounds such as polycyclic aromatic hydrocarbons (PAHs), endotoxins, and fungi (Harrison & Yin, 2000). Among them, PAHs are the main components of PM2.5, accounting for approximately 80% (Javed *et al.*, 2019). PAHs are mainly derived from fossil fuels such as petroleum and coal or man-made organic chemicals. PAHs are highly lipophilic and can enter cells directly through the cell membrane. PAHs can bind to cytoplasmic aryl hydrocarbon receptor (AhR) and then translocate to the

1 Tissue Bank, Chang Gung Memorial Hospital at Linkou, Taoyuan, Taiwan  
2 Graduate Institute of Health Industry Technology and Research Center for Chinese Herbal Medicine, College of Human Ecology, Chang Gung University of Science and Technology, Taoyuan, Taiwan  
3 Liver Research Center, Department of Hepato-Gastroenterology, Chang Gung Memorial Hospital at Linkou, Taoyuan, Taiwan  
4 Graduate Institute of Natural Products, Chang Gung University, Taoyuan, Taiwan  
5 Department of Clinical Laboratory Sciences and Medical Biotechnology, College of Medicine, National Taiwan University, Taipei, Taiwan  
6 Institute of Statistical Science, Academia Sinica, Taipei, Taiwan  
7 Department of Anatomic Pathology, Chang Gung Memorial Hospital, Linkou, Taoyuan, Taiwan  
8 Institute of Biomedical Sciences, Academia Sinica, Taipei, Taiwan  
9 Department of Internal Medicine, National Taiwan University Hospital and National Taiwan University College of Medicine, Taipei, Taiwan  
10 Genomics Research Center, Academia Sinica, Taipei, Taiwan  
\*Corresponding author. Tel: +886-2-23562905; E-mail: pcyang@ntu.edu.tw  
\*\*Corresponding author. Tel: +886-3-21189993; E-mail: d49417002@gmail.com  
†These authors contributed equally to this work

nucleus to promote the expression of the cytochrome P450 family, which assists in the metabolism of carcinogens and environmental pollutants (Romagnolo *et al*, 2010). In addition, PAHs are known to photochemically react with sulfur oxides, nitrogen oxides, and ozone in the air to form secondary pollutants that are carcinogenic and genotoxic to the human body (Henkler *et al*, 2012).

Long-term exposure to air pollution is one of the causes of the high incidence of lung cancer (Pun *et al*, 2017). The inhalation of substances containing PAHs, such as PM2.5, is known to increase the risk of lung cancer (Singh *et al*, 2018). Exposure to PM2.5 can cause DNA damage and activation of AhR, epidermal growth factor receptor (EGFR), and the immune system, leading to tumorigenesis (Chen *et al*, 2020). Recent studies have shown that PM2.5 exposure promotes the expression of transmembrane serine protease 2 (TMPRSS2) (Li *et al*, 2021), a type 2 transmembrane serine protease family (TTSP) that is known to promote SARS-CoV-2 infection and is also involved in the regulation of carcinogenesis (Martin & List, 2019; Hoffmann *et al*, 2020). Although many epidemiological studies have confirmed that PM2.5 is a risk factor for the occurrence of lung cancer (Al-Hamdan *et al*, 2017; Tseng *et al*, 2019), the definitive role of PM2.5 in the development of lung cancer remains largely unknown. In this study, we show that long-term exposure of lung cancer cells to PM2.5 can activate AhR to promote the expression of TMPRSS2 and IL18 and promote lung cancer progression.

## Results

### Effects of short- and long-term exposure to PM2.5 on cell proliferation, EGFR signaling, and anchorage-independent growth of lung cancer cells

The cytotoxic effects of PM2.5 on normal lung and lung cancer cells were evaluated by short-term 24-h exposure using the normal lung fibroblast cell lines MRC5 and IMR90 and lung cancer cell lines A549 (EGFR wild-type) and H1975 (EGFR L858R+T790M). As shown in Fig 1A, short-term exposure to PM2.5 appears to produce a greater cytotoxic effect on H1975 cells than on IMR90 ( $P < 0.001$ ), MRC5 ( $P < 0.001$ ), and A549 ( $P < 0.001$ ) cells. The IC50s for IMR90, MRC5, and A549 were over 100  $\mu\text{g}/\text{ml}$ , while the IC50 of H1975 was  $68.6 \pm 3.46 \mu\text{g}/\text{ml}$  (Fig 1A). As EGFR activation is the main driver of lung cancer (Tumbrink *et al*, 2021), the effects of exposure to PM2.5 on EGFR signaling were examined next. As shown in Fig 1B, PM2.5 induced the activation of phosphor (p)-EGFR, and pSTAT3 in A549 cells but induced the activation of only pAKT in H1975 cells.

To examine the effects of long-term exposure on cancer cells, we cultured A549 and H1975 cells in the presence of PM2.5 at 50  $\mu\text{g}/\text{ml}$  for 90 days before analysis of proliferation and EGFR activation. As shown in Fig 2A and B, long-term exposure to PM2.5 appeared to increase the proliferation of both EGFR wild-type and EGFR mutant cancer cells ( $P < 0.05$ ). The effects of long-term exposure on EGFR activation were also examined at different times of continuous exposure to PM2.5 at 50  $\mu\text{g}/\text{ml}$  in lung cancer cells. As shown in Fig 2C, the expression of pEGFR in H1975 cells was continuously upregulated at different times of exposure to PM2.5 and reached the highest level after 90 days. Exposure to PM2.5 also upregulated the expression of activated pEGFR in A549 cells (Fig 2D) but resulted in

the highest activation on Day 1, followed by a show decrease to lower levels after longer exposure times. Next, we examined the effects of long-term exposure to PM2.5 on anchorage-independent growth in H1975 and A549 cells. As shown in Fig 2E and F, long-term exposure to PM2.5 substantially increased the ability of H1975 and A549 cells to undergo anchorage-independent growth, although the increased pattern did not reach statistical significance in A549 cells. Increased ability to proliferate and to undergo anchorage-independent growth was also observed in PC9 lung cancer cells exposed to PM2.5 for 60 days (Fig EV1). Thus, long-term exposure to PM2.5 increased the ability of cancer cells to proliferate and undergo anchorage-independent growth.

### Long-term exposure of lung cancer cells to PM2.5 enhances tumorigenicity *in vivo*

A previous study showed that A549 cells treated with PM2.5 for 10 days have an increased ability to migrate and invade and induce cancer stem cell properties (Wang *et al*, 2019). Here, we examined the effects of long-term exposure to PM 2.5 on H1975 cells. To determine whether the increased ability to proliferate and to undergo anchorage-independent growth by long-term exposure to PM2.5 may indeed impact tumor growth *in vivo*, we subcutaneously injected unexposed and PM2.5-exposed H1975 cells into the flanks of nude mice, and the tumor volumes were determined twice a week. At 16 days after injection, the mice were euthanized. As shown in Fig 3A and B, the tumor growth in the mice injected with PM2.5-exposed H1975 cells was considerably faster than that in the mice injected with untreated H1975 cells. Consistent with this finding, the levels of Ki-67, TMPRSS2, and IL18 were greatly increased in the tumors derived from the PM2.5-exposed cells compared to the tumors derived from the untreated cells (Fig 3C). These results indicate that long-term exposure to PM2.5 enhanced the tumorigenic abilities of lung cancer cells *in vivo*.

### Long-term exposure to PM2.5 elevates the expression of TMPRSS2 by activating AhR in lung cancer cells

We used whole-transcriptome sequencing to further explore the mechanism of action affected by long-term exposure to PM2.5 in H1975 cells. A total of 292 genes exhibited differential expression over twofold greater or lesser in the PM2.5-treated H1975 cells. These differentially expressed genes were subjected to ingenuity pathway analysis, which revealed that PM2.5 affected transcriptional dysregulation in cancer, the hedgehog signaling pathway, viral protein interactions with cytokine and cytokine receptors, retinol metabolism, alanine, aspartate, and glutamate metabolism, cytokine–cytokine receptor interactions, hypertrophic cardiomyopathy, malaria, cell adhesion molecules, and the AGE-RAGE signaling pathway in diabetic complications (Fig EV2). The 10 differentially expressed genes with the highest scores are listed in Table 1. Among them, TMPRSS2 is a known oncogene that promotes tumor progression and metastasis in prostate cancer (Stone, 2017; Ko *et al*, 2020). Previous studies have shown that PM2.5 exposure upregulates the expression of TMPRSS2 in pulmonary fibroblasts (Li *et al*, 2021). We thus selected TMPRSS2 for further study. To address the potential importance of TMPRSS2 upregulation in PM2.5-treated H1975 cells, we first examined whether PM2.5

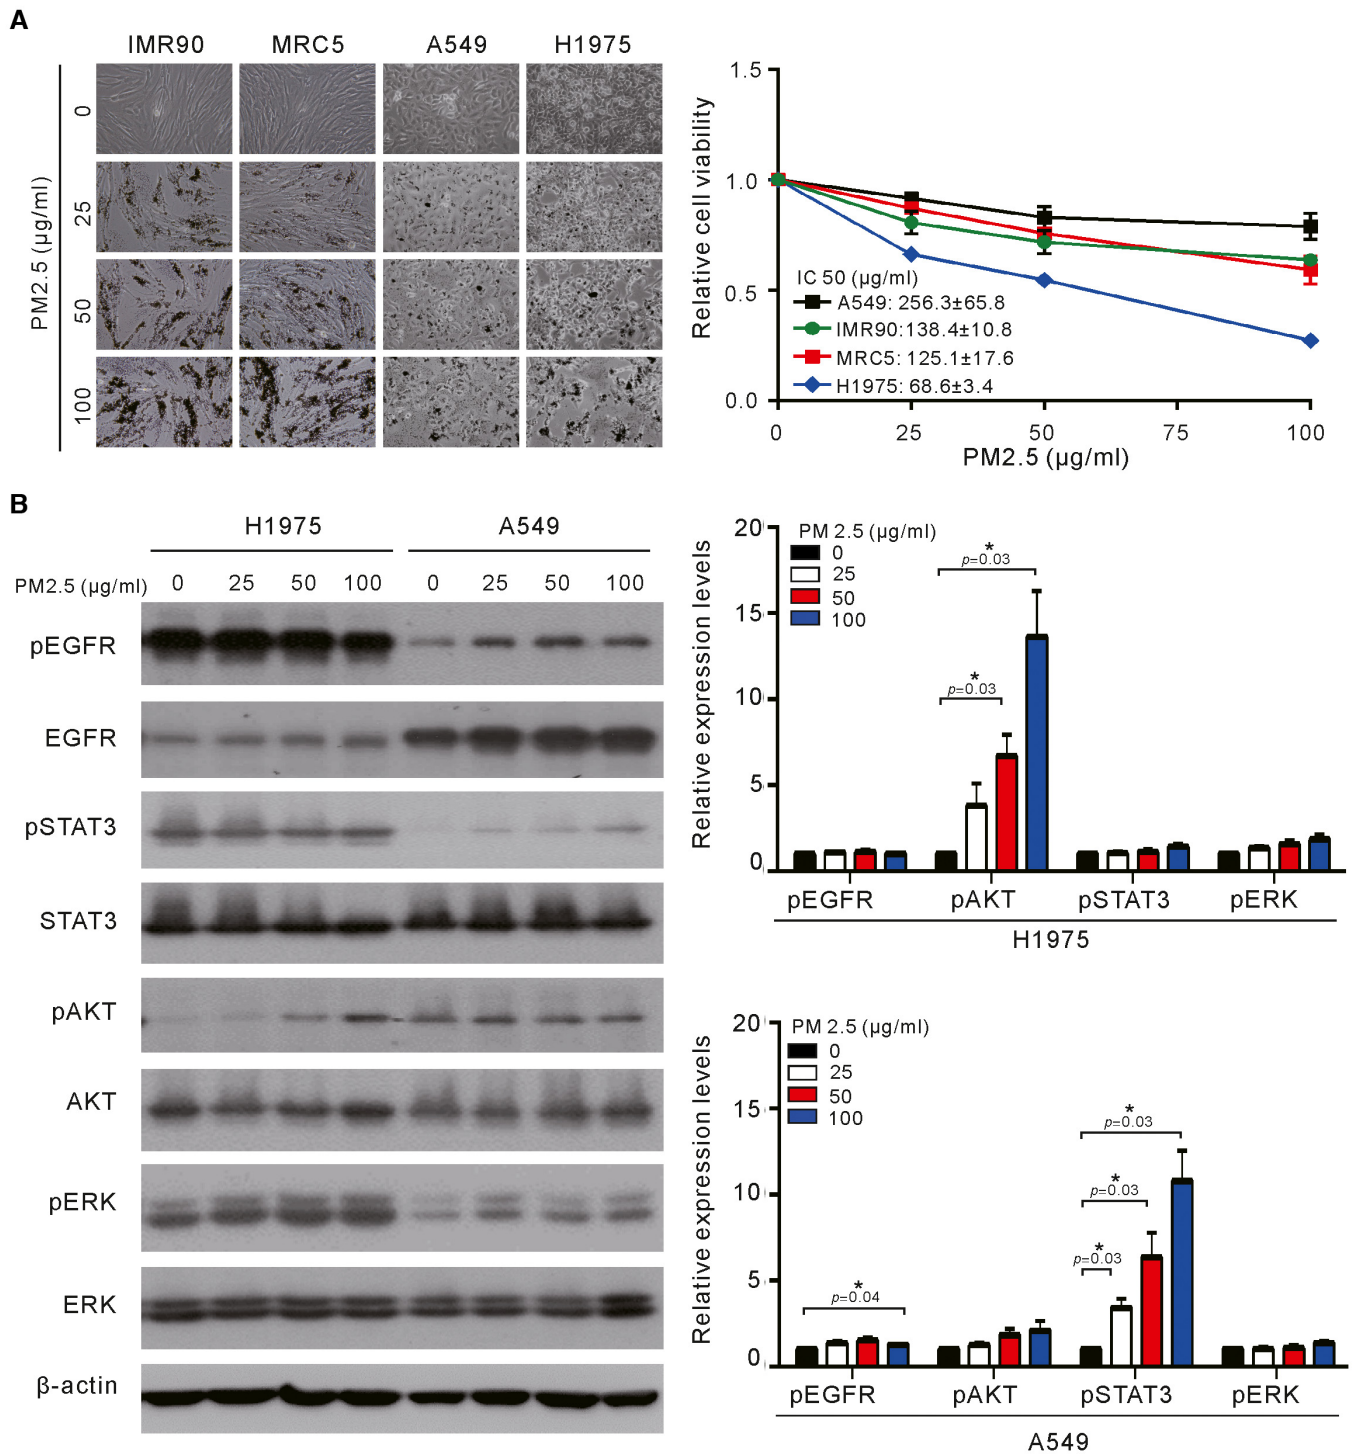

**Figure 1. Effects of short-term exposure to PM<sub>2.5</sub> on cell viability and EGFR signaling in lung cancer cells.**

A Normal lung cells (IMR90 and MRC5) and lung cancer cells (A549 and H1975) were treated with various concentrations of PM<sub>2.5</sub> for 24 h, and cell viability was assessed by a Trypan blue assay. The values are the mean  $\pm$  SD of three independent experiments.

B H1975 and A549 cells were treated with various concentrations of PM<sub>2.5</sub> for 24 h, and their cell lysates were analyzed for phosphor-ERK (pERK), phosphor-AKT (pAKT), phosphor-STAT3 (pSTAT3), phosphor-EGFR (pEGFR), ERK, AKT, STAT3, and EGFR by Western blotting.  $\beta$ -actin served as the loading control. The results shown are from one of three similar experiments (left panel). The relative expression levels of pEGFR, pAKT, pSTAT3, and pERK were quantified by normalizing with  $\beta$ -actin and are shown in the right panel. The values are the mean  $\pm$  SD of three independent experiments. \* $P < 0.05$ , as analyzed with one-sample  $t$ -test and compared with untreated cells.

Source data are available online for this figure.

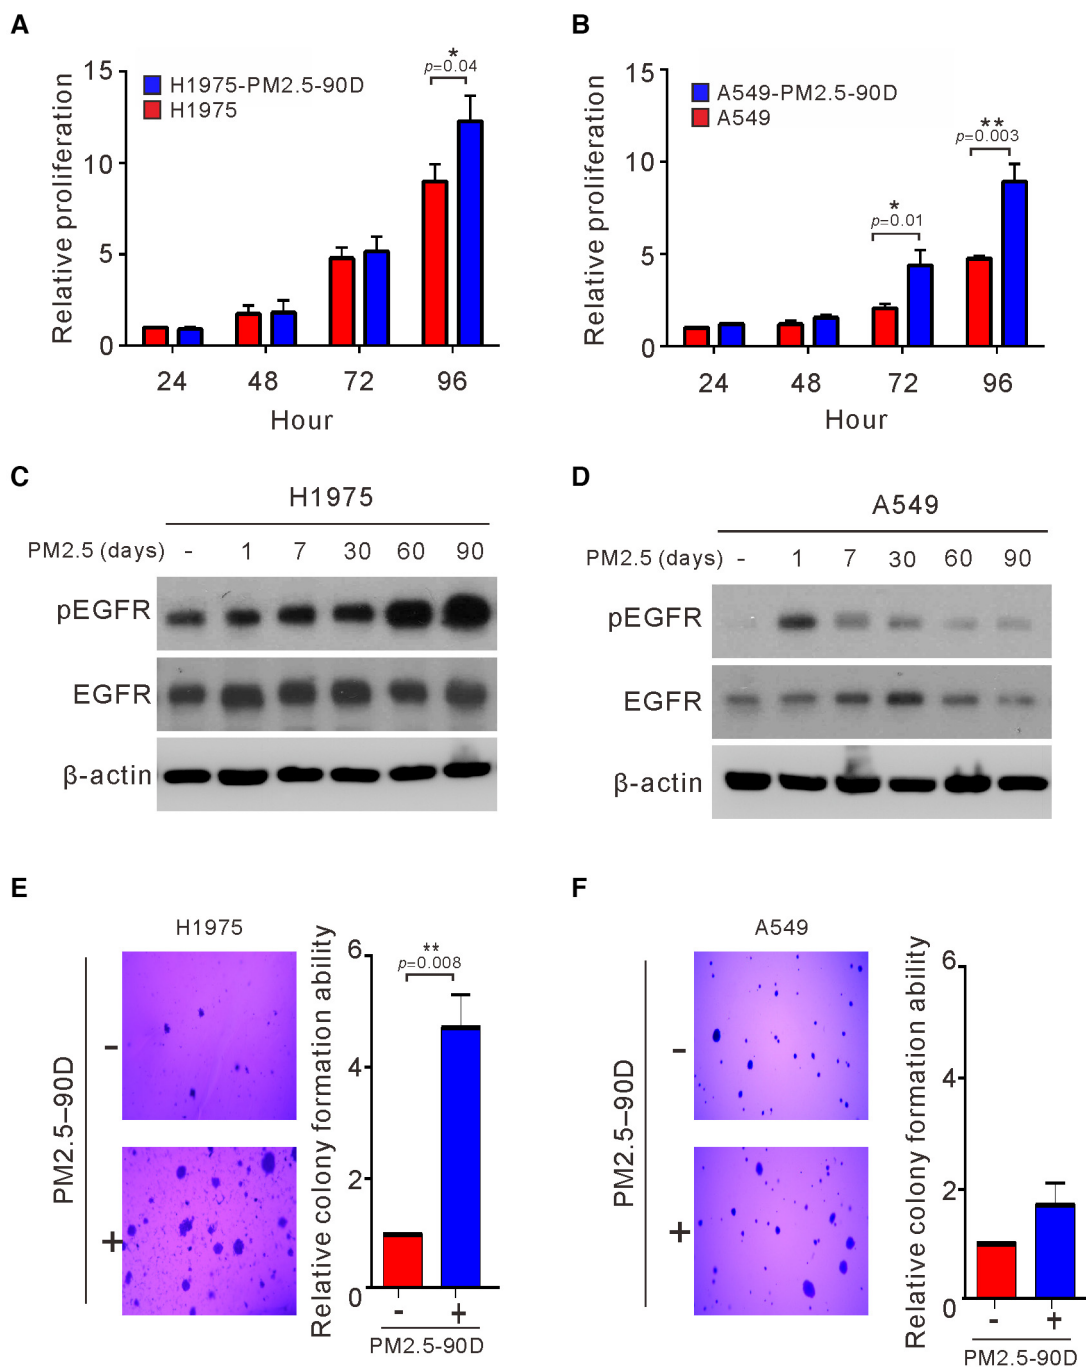

**Figure 2. Effects of long-term exposure to PM2.5 on cell proliferation, EGFR activation, and anchorage-independent growth of lung cancer cells.**

A, B H1975 and A549 cells were treated with PM2.5 at 50  $\mu$ g/ml for 90 days, and the proliferation of the treated cells was assessed by Trypan blue assays.

C, D H1975 and A549 cells were exposed to PM2.5 at 50  $\mu$ g/ml for different lengths of time, and the cell lysates of treated cells were assessed for phosphorylated EGFR (pEGFR) and EGFR by Western blotting.  $\beta$ -actin served as the loading control.

E, F H1975 and A549 cells were treated with PM2.5 at 50  $\mu$ g/ml for 90 days. The anchorage-independent growth was assessed by a soft agar colony formation assay. The number of colonies was scored, and the data are presented as the relative colony formation ability.

Data information: The data shown are the means  $\pm$  SDs from three independent experiments. \* $P < 0.05$  and \*\* $P < 0.01$ , compared with untreated control cells. The results shown in (C and D) are from one of three similar experiments. (A and B)  $P$ -values were determined by two-sample  $t$ -test. (E and F)  $P$ -values were determined by one-sample  $t$ -test.

Source data are available online for this figure.

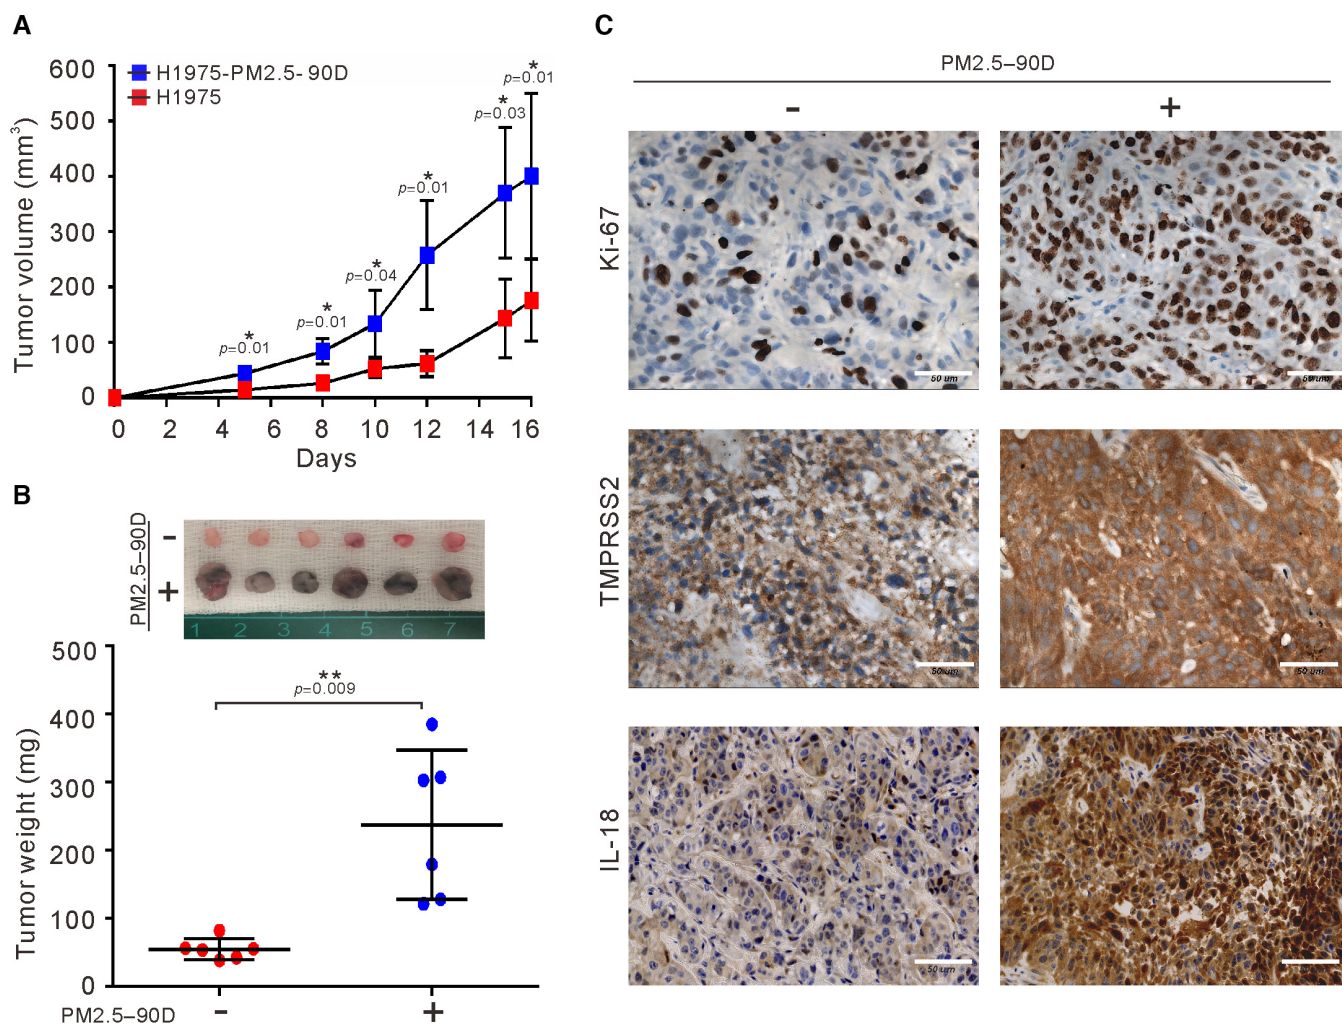

**Figure 3. Effects of long-term exposure to PM2.5 on tumor growth of lung cancer cells *in vivo*.** H1975 cells were exposed to 50  $\mu\text{g}/\text{ml}$  PM2.5 for 90 days. Both unexposed and exposed cells were injected subcutaneously into the flank of each mouse ( $n = 6$  per group).

A, B The tumor volume and excised tumor weight were measured. The sizes of tumors excised from each group are shown at the top of (B).

C IHC staining of excised tumors for Ki-67, IL18, and TMRSS2 is shown in (C). Scale bars, 50  $\mu\text{m}$ .

Data information: The results shown in (A) and (B) are presented as the means  $\pm$  SDs of six mice. \* $P < 0.05$  and \*\* $P < 0.01$ , compared with untreated group. (A)  $P$ -values were determined by two-way repeated measures ANOVA with pairwise comparison of *post hoc* analysis with Benjamini–Hochberg (BH) correction. (B)  $P$ -values were determined by two-sample  $t$ -test.

Source data are available online for this figure.

induced TMRSS2 upregulation by quantitative real-time RT-PCR and Western blotting. As shown in Fig 4A and B, TMRSS2 was increased to a higher level in the PM2.5-treated 1975 cells than in the untreated cells.

Polycyclic aromatic hydrocarbons can activate AhR and then regulate the transcriptional expression of related genes (Tsay *et al*, 2013). Studies have shown that there are putative binding sites for AhR in the promoter of TMRSS2 (Watzky *et al*, 2021). Therefore, we hypothesized that long-term exposure to PM2.5 activates AhR translocation to the nucleus and then binds to the promoter of TMRSS2. To test this hypothesis, we used nuclear fractionation and Western blot analysis to examine the effects of PM2.5 treatment on the cellular distribution of AhR in nuclear and whole-cell lysates.

As shown in Fig 4C, the levels of nuclear AhR were greatly increased in the PM 2.5-exposed H1975 cells. To verify the nuclear localization of AhR, we performed immunofluorescence staining of AhR in A549 and H1975 cell lines. As shown in Fig EV3, elevated nuclear localization of AhR was evident in the PM2.5-treated cells. To determine whether the increased nuclear AhR may be associated with enhanced binding at the promoter of TMRSS2, we performed ChIP-qPCR analysis in the PM2.5-treated and untreated H1975 cells. As shown in Fig 4D, AhR binding was enhanced at four distinct sites of the TMRSS2 promoter in the PM2.5-exposed H1975 cells. These results suggest that long-term exposure to PM2.5 can activate AhR to enhance the expression of TMRSS2 in lung cancer cells. Consistent with a role of AhR in the expression of TMRSS2, we observed

**Table 1. Identities of the 10 highest-scored genes differentially expressed in PM2.5-treated H1975 cells.**

| Rank | Gene name | Gene description                                                                | NCBI gene ID |
|------|-----------|---------------------------------------------------------------------------------|--------------|
| 1    | NME1-NME2 | NME1-NME2 readthrough [Source: HGNC Symbol; Acc: HGNC: 33531]                   | 654364       |
| 2    | ZBTB9     | Zinc finger and BTB domain containing 9 [Source: HGNC Symbol; Acc: HGNC: 28323] | 221504       |
| 3    | RNASE7    | Ribonuclease A family member 7 [Source: HGNC Symbol; Acc: HGNC: 19278]          | 84659        |
| 4    | HES7      | Hes family bHLH transcription factor 7 [Source: HGNC Symbol; Acc: HGNC: 15977]  | 84667        |
| 5    | BEX5      | Brain-expressed X-linked 5 [Source: HGNC Symbol; Acc: HGNC: 27990]              | 340542       |
| 6    | CCDC173   | Coiled-coil domain containing 173 [Source: HGNC Symbol; Acc: HGNC: 25064]       | 129881       |
| 7    | FBP2      | Fructose-bisphosphatase 2 [Source: HGNC Symbol; Acc: HGNC: 3607]                | 8789         |
| 8    | AKNAD1    | AKNA domain containing 1 [Source: HGNC Symbol; Acc: HGNC: 28398]                | 254268       |
| 9    | CPXM2     | Carboxypeptidase X, M14 family member 2 [Source: HGNC Symbol; Acc: HGNC: 26977] | 119587       |
| 10   | TMPRSS2   | Transmembrane protease, serine 2 [Source: HGNC Symbol; Acc: HGNC: 11876]        | 7113         |

that the AhR antagonist CH223191 inhibited the expression of TMPRSS2 in PM2.5-treated cells (Fig 4E).

#### Effects of TMPRSS2 depletion on the anchorage-independent growth and *in vivo* tumor growth of lung cancer cells

TMPRSS2 is associated with the development of prostate cancer and the promotion of SARS-CoV-2 infection of lung cells (Hoffmann *et al*, 2020). However, the biological function of TMPRSS2 in lung cancer is unclear, and the current research results are inconsistent (Wang *et al*, 2021; Schneider *et al*, 2022). To determine whether the expression level of TMPRSS2 is increased in lung cancer cells, we examined the endogenous protein level of TMPRSS2 in four established lung cancer cell lines and two normal lung fibroblasts by Western blotting. As shown in Fig 5A, a high level of TMPRSS2 protein was detected in three lung cancer cell lines (H460, A549, and H1975). A low level of TMPRSS2 was also detected in H1299 lung cancer cells and normal IMR90 fibroblasts but was undetectable in normal MRC5 fibroblasts. To determine whether the level of TMPRSS2 may impact tumorigenicity in lung cancer cells, we examined the effect of stable depletion of TMPRSS2 on anchorage-independent growth of H1975 cells. As shown in Fig 5B and C, the levels of TMPRSS2 and anchorage-independent growth were greatly reduced in the cells stably expressing shTMPRSS2-1. The cells stably expressing shTMPRSS2-2 had only a slight reduction in the

expression of TMPRSS2 and a slight inhibition of anchorage-independent growth. To determine whether TMPRSS2 affects lung cancer cell tumorigenesis *in vivo*, we performed a xenotransplantation assay in nude mice. As shown in Fig 5D, the growth of the shTMPRSS2-1 H1975 cell-derived xenograft tumors was slower than that of the vector control cell-derived xenograft tumors. Similarly, the average weight of the excised shTMPRSS2-1 tumors was lower than that of the vector control tumors (Fig 5E). These results show that the downregulation of TMPRSS2 inhibited lung cancer cell tumor growth *in vitro* and *in vivo*.

#### Transcriptomic profiling of TMPRSS2-regulated genes in H1299 cells

To explore the molecular effects of TMPRSS2 on lung cancer cells, we examined the effects of overexpressing TMPRSS2 using H1299 cells, which express low levels of endogenous TMPRSS2 (Fig 5A). First, we employed whole-transcriptome sequencing to compare the gene expression profiles of H1299 cells transfected with or without TMPRSS2 (Fig 6A). A total of 169 putative genes were identified in the H1299 cells that overexpressed TMPRSS2 and showed a significant twofold difference in the expression level. With ingenuity pathway analysis, the pathways that were enriched in the TMPRSS2-overexpressing H1299 cells were determined and included coronavirus disease–COVID-19, legionellosis, ribosome, influenza A, lipid and atherosclerosis, *Yersinia* infection, malaria, hedgehog signaling pathway, NOD-like receptor signaling pathway, and pathogenic *Escherichia coli* infection (Fig EV4). Table 2 shows the top 10 upregulated genes in the TMPRSS2-overexpressing H1299 cells. Among them, IL18 has been shown to play a role in carcinogenesis and tumor progression (Zitvogel *et al*, 2012). IL18 expression showed positive correlations with TMPRSS2 in various human tissues (Cao *et al*, 2021). To further confirm the correlation of IL18 upregulation by TMPRSS2 overexpression, we performed RT–qPCR and Western blot analysis to detect IL18 mRNA and protein levels in the TMPRSS2-overexpressing H1299 cells. As shown in Fig 6B and C, the IL18 mRNA and protein levels were increased in the TMPRSS2-overexpressing H1299 cells. Interestingly, we found that the mRNA and protein levels of IL18 and TMPRSS2 were also increased in the H1975 cells and A549 cells exposed to PM2.5 for 90 days, although the protein-increased level of IL18 did not reach the statistical significance in A549 cells (Fig 6D–H). These results suggest that enhanced expression of IL18 is correlated with increased expression of TMPRSS2.

#### Clinical correlation of TMPRSS2 expression with nuclear AhR, IL18, and overall cancer staging in human lung cancer specimens

To evaluate the role of TMPRSS2 expression in lung cancer progression *in vivo*, we examined the expression levels of TMPRSS2, IL18, and nuclear AhR by IHC in tumor specimens from 25 lung cancer patients. Examples of scoring the intensity of immunoreactivity in IHC are shown in Fig EV5. Representative immunostaining of normal tissue revealed almost no to very weak expression of TMPRSS2, IL18, and AhR (Fig 7A). IHC staining of two representative tumor specimens revealed that a high expression level of TMPRSS2 was accompanied by a high expression level of nuclear AhR and IL18, while a low expression level of TMPRSS2 was associated with a low

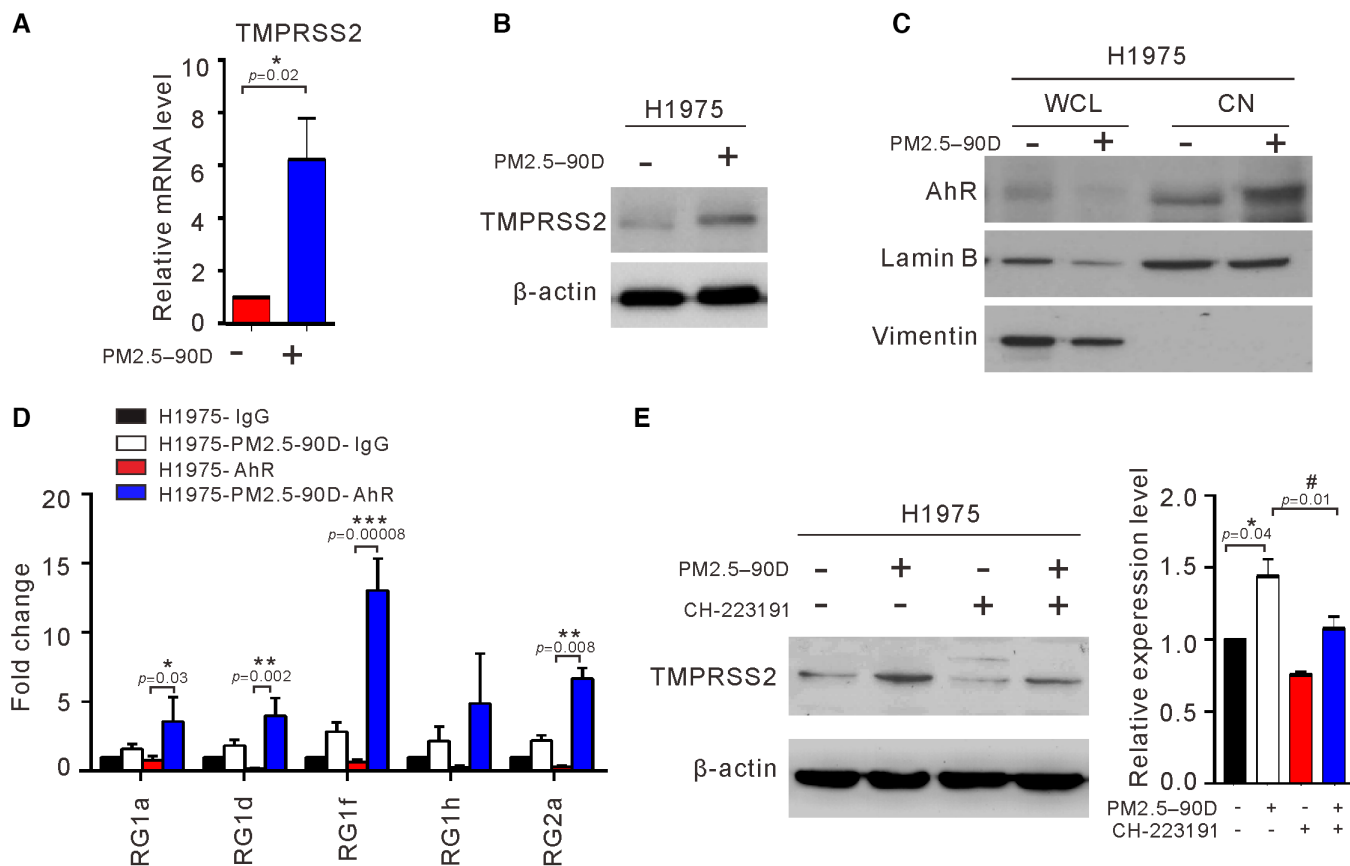

**Figure 4. Effects of long-term exposure to PM2.5 on the AhR-TMPRSS2 axis in lung cancer cells.**

- A, B H1975 cells were treated with 50  $\mu\text{g}/\text{ml}$  PM2.5 for 90 days, and the expression levels of TMPRSS2 mRNA and protein were determined by real-time RT-PCR (A) and Western blotting (B), respectively.
- C The proteins from whole cell lysates (WCL) and nuclear fractions (CN) were analyzed for AhR, lamin B (nuclei marker), and vimentin (cytoplasm marker) by Western blotting.
- D ChIP-qPCR analysis of AhR binding to the promoter of the TMPRSS2 locus. The chromatin of untreated or treated H1975 cells was immunoprecipitated using AhR antibody. Precipitated genomic DNA was amplified for the five sites (RG1a, 1d, 1f, 1h, and 2a) in the proximal promoter of the TMPRSS2 locus by real-time PCR. Data were normalized to the input and expressed as "Fold change" relative to the IgG control of H1975 cells.
- E Western blot analysis of TMPRSS2 expression in cells treated with CH223191 at 10  $\mu\text{M}$  for 48 h. The relative expression level of TMPRSS2 was quantified by normalizing with  $\beta$ -actin and is shown in the right panel.

Data information: The data shown represent the mean  $\pm$  SD of three independent experiments. \* $P < 0.05$  and \*\* $P < 0.01$ , and \*\*\* $P < 0.001$ , compared with untreated cells. # $P < 0.05$ , compared with PM2.5-treated cells. The results shown in (B, C, and E) are from one of three similar experiments. (A)  $P$ -values were determined by one-sample  $t$ -test. (D) One-way ANOVA and Tukey's multiple-comparisons test of *post hoc* analysis were used when homogeneity of variance across groups (RG1a, RG1d, and RG1f) occurred; Welch's ANOVA and Games-Howell test of *post hoc* analysis were used when variance across groups was not equal (RG1h and RG2a). (E)  $P$ -values were determined by one-sample  $t$ -test.

Source data are available online for this figure.

**Figure 5. Effects of TMPRSS2 depletion on the anchorage-independent growth and *in vivo* tumor growth of lung cancer cells.**

- A Expression of TMPRSS2 was examined by Western blots of four lung cancer cell lines (H460, A546, H1299, and H1975) and two normal fibroblasts (MRC5 and IMR90).
- B, C H1975 cells were infected with sh-TMPRSS2 (sh-TMPRSS2-1 and sh-TMPRSS2-2) or empty vector (Vector). The stable clones of TMPRSS2 knockdown cells were analyzed for the expression of TMPRSS2 by Western blots (B) and their ability to perform anchorage-independent growth in soft agar (C).
- D, E H1975-shTMPRSS2-1 cells were injected subcutaneously into mice ( $n = 9$  per group), and the tumor growth of the implanted cells was measured (D). The excised tumors and their weights are shown in (E).

Data information: The results shown in (A and B) are from one of three similar experiments.  $\beta$ -actin was used as the loading control. The data shown in (C) represent the means  $\pm$  SDs from three independent experiments. The results shown in (D) and (E) are presented as the means  $\pm$  SDs of nine mice. \* $P < 0.05$ , \*\* $P < 0.01$ , and \*\*\* $P < 0.001$  compared with vector control. (C)  $P$ -values were determined by one-sample  $t$ -test. (D and E)  $P$ -values were determined by two-sample  $t$ -test.

Source data are available online for this figure.

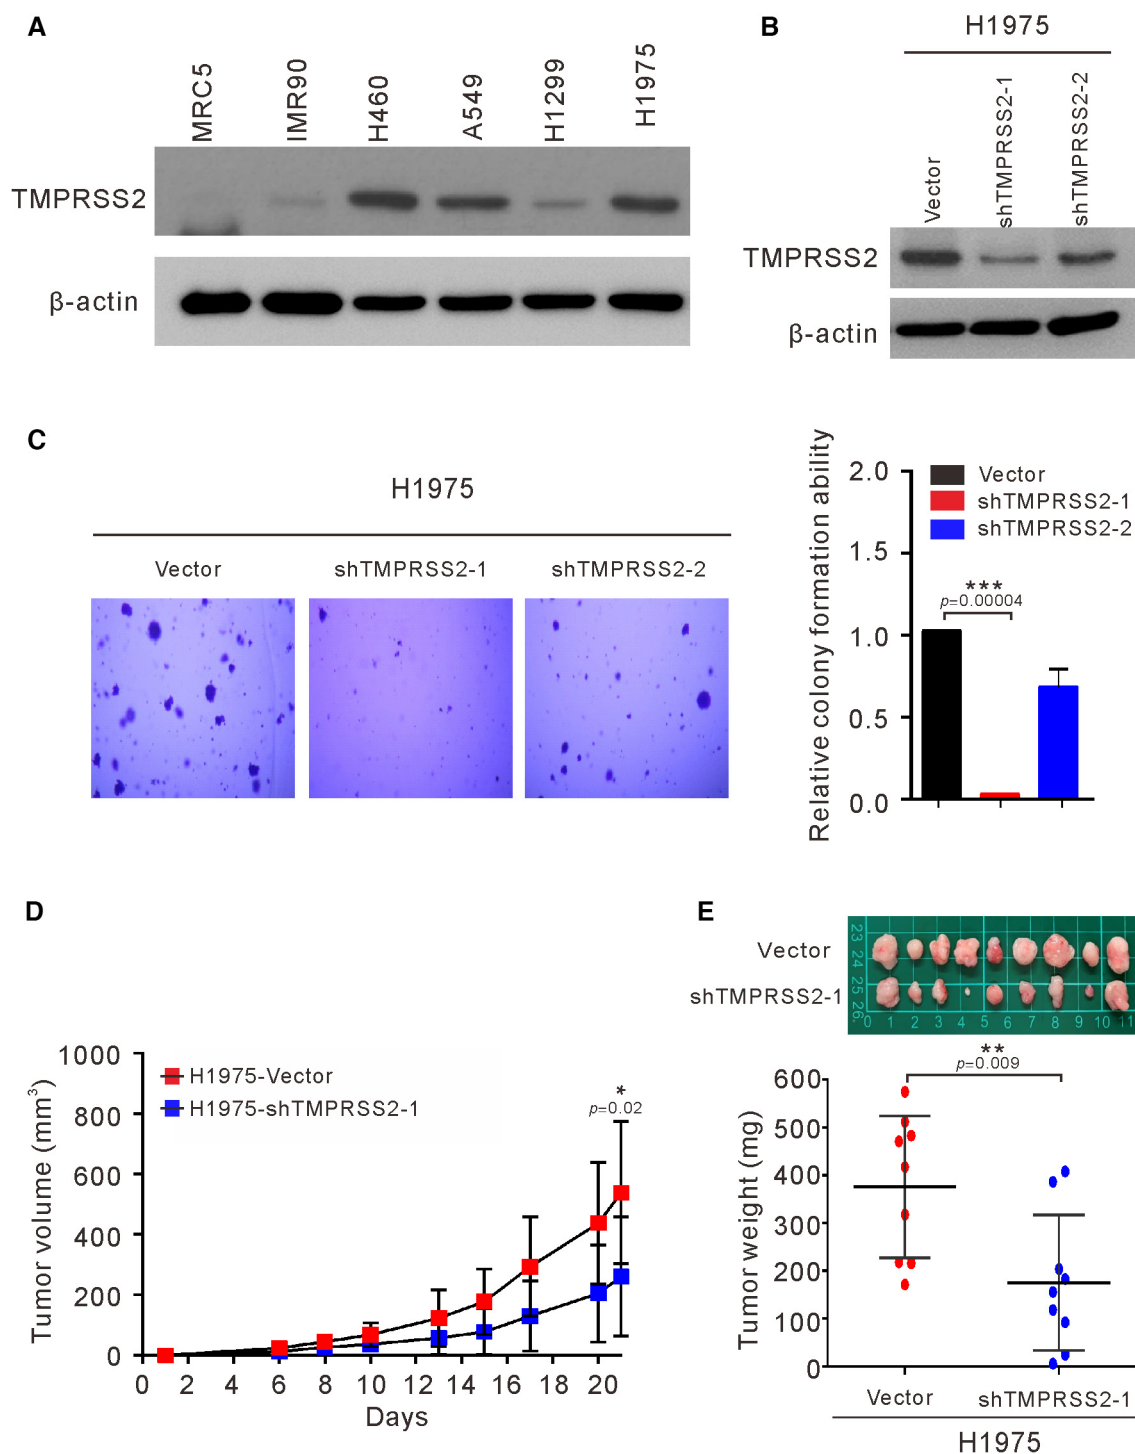

Figure 5.

expression level of nuclear AhR and IL18 (Fig 7B). Statistical analysis of all specimens showed a significant correlation between the expression level of TMPRSS2 and nuclear AhR ( $P < 0.01$ ) and IL18 ( $P < 0.05$ ) (Table 3). Elevated expression of TMPRSS2 was also positively correlated with the advanced overall stages of lung cancer patients ( $P < 0.05$ ; Table 3). Notably, the expression level of TMPRSS2 also correlated with sex ( $P < 0.05$ ; Table 3).

## Discussion

Most studies of air pollution on the progression of lung cancer are based on “population-based” epidemiology. In this study, lung cancer cells exposed to PM<sub>2.5</sub> for 90 days were employed as a cellular model to evaluate the effects of long-term exposure to PM<sub>2.5</sub> on lung cancer progression. As exposure to PM<sub>2.5</sub> can cause EGFR



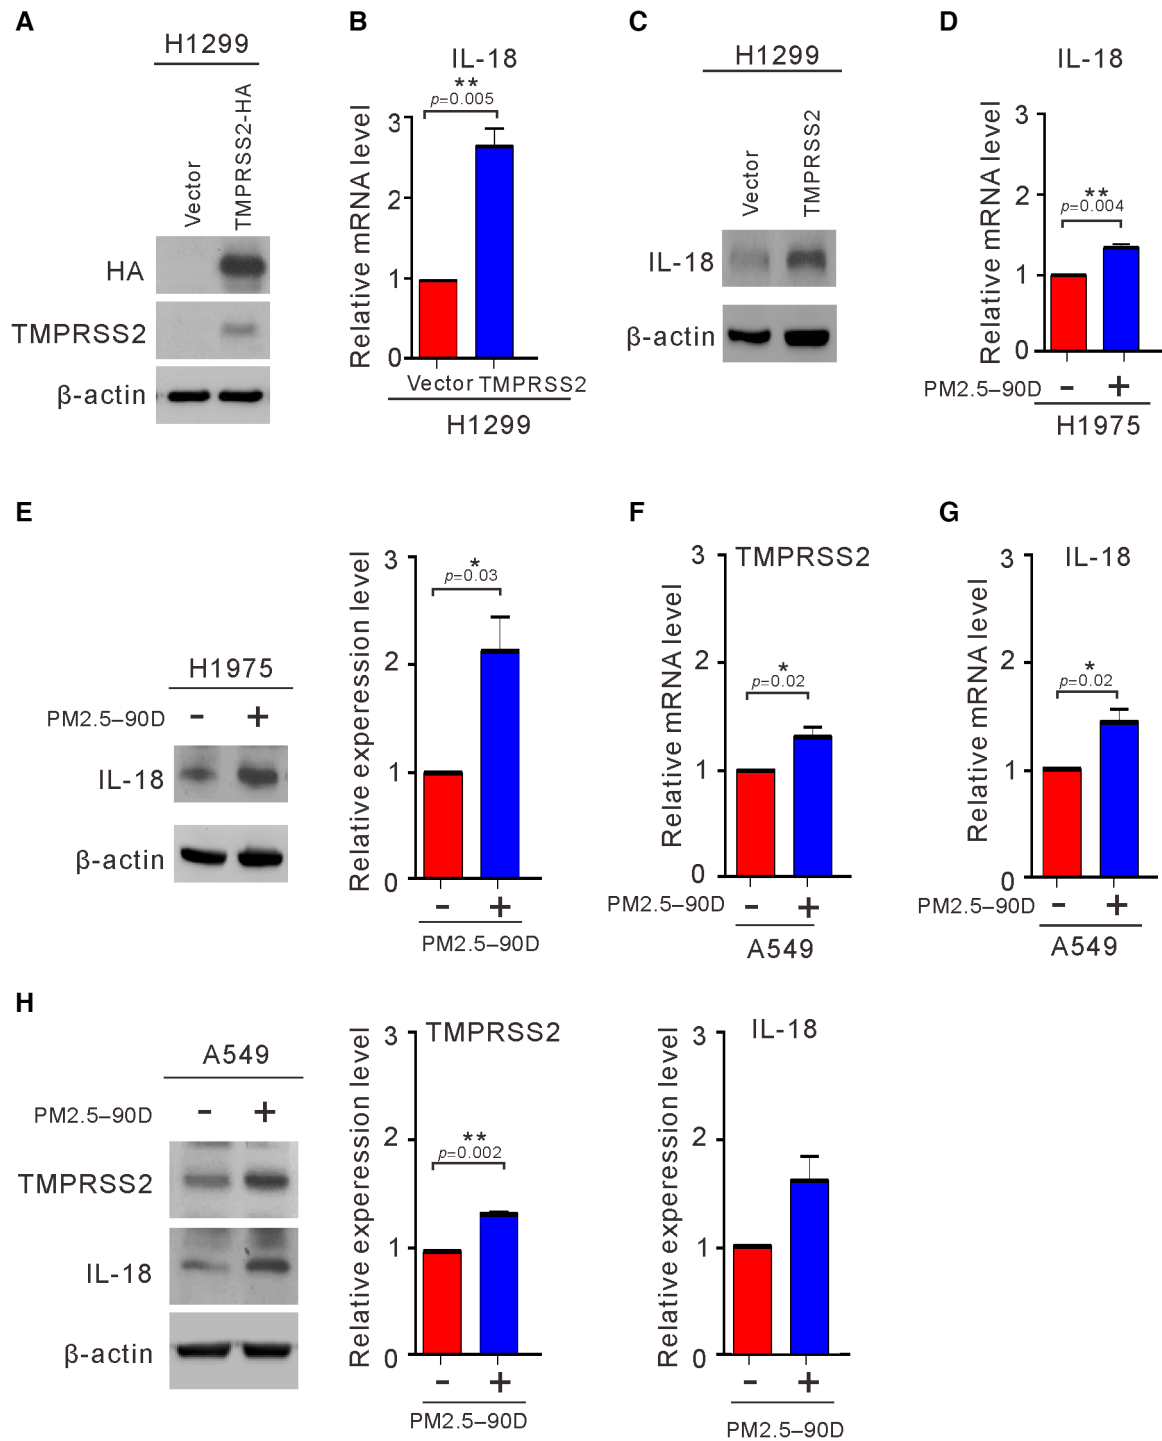

**Figure 6. Effects of TMPRSS2 overexpression on the induction of IL18.**

A–C H1299 cells were transfected with TMPRSS2-HA or the empty vector (Vector). After 48 h, the transfected cells were assayed for the expression of TMPRSS2 (A) and the induction of IL18 by qRT-PCR (B) and Western blotting (C).

D–H The expression level of IL18 was examined in H1975 cells (D, E) and A549 cells (F–H) exposed to PM2.5 at 50  $\mu$ g/ml for 90 days by qRT-PCR (D, F, and G) and Western blotting (E and H).

Data information: The results shown in (A, C, E, and H) are from one of three similar experiments.  $\beta$ -actin was used as the loading control. The data shown in (E and H) were normalized to  $\beta$ -actin from three independent experiments. The data shown in (B, D–H) represent the means  $\pm$  SDs from three independent experiments;

\* $P < 0.05$  and \*\* $P < 0.01$ , as analyzed with one-sample  $t$ -test and compared with vector control or untreated cells.

Source data are available online for this figure.

**Table 2. Identities of the 10 highest-scored genes differentially expressed in TMPRSS2-overexpressing H1299 cells.**

| Rank | Gene name      | Gene description                                                                    | NCBI gene ID |
|------|----------------|-------------------------------------------------------------------------------------|--------------|
| 1    | RPL17-C18orf32 | RPL17-C18orf32 readthrough [Source: HGNC Symbol; Acc: HGNC: 44661]                  | 100526842    |
| 2    | IL18           | Interleukin 18 [Source: HGNC Symbol; Acc: HGNC: 5986]                               | 3606         |
| 3    | OLAH           | Oleoyl-ACP hydrolase [Source: HGNC Symbol; Acc: HGNC: 25625]                        | 55301        |
| 4    | TMPRSS2        | Transmembrane serine protease 2 [Source: HGNC Symbol; Acc: HGNC: 11876]             | 7113         |
| 5    | HSPA6          | Heat shock protein family A (Hsp70) member 6 [Source: HGNC Symbol; Acc: HGNC: 5239] | 3310         |
| 6    | GCOM1          | GRINL1A complex locus 1 [Source: HGNC Symbol; Acc: HGNC: 26424]                     | 145781       |
| 7    | RPL36A-HNRNP2  | RPL36A-HNRNP2 readthrough [Source: HGNC Symbol; Acc: HGNC: 48349]                   | 100529097    |
| 8    | GAGE12D        | G antigen 12D [Source: HGNC Symbol; Acc: HGNC: 31904]                               | 100132399    |
| 9    | CXCL8          | C-X-C motif chemokine ligand 8 [Source: HGNC Symbol; Acc: HGNC: 6025]               | 3576         |
| 10   | VEGFD          | Vascular endothelial growth factor D [Source: HGNC Symbol; Acc: HGNC: 3708]         | 2277         |

activation (Romagnolo *et al*, 2010; Chen *et al*, 2020), we first examined the effects of exposure to PM2.5 on EGFR signaling. Our results revealed that short-term exposure to PM2.5 for 24 h indeed activated the EGFR pathway in lung cancer cells (Fig 1). Long-term exposure to PM 2.5 also upregulated the expression of activated EGFR (pEGFR) in lung cancer cells harboring EGFR mutations (H1975) (Fig 2C). Long-term exposure to PM2.5 enhanced the ability of H1975 cells to undergo anchorage-independent growth and to promote tumor cell growth both *in vitro* and *in vivo* (Figs 2 and 3). Therefore, activation of EGFR signaling can be one of the factors that contribute to the enhanced ability to promote tumor growth in PM2.5-exposed lung cancer cells.

To further explore the mechanism involved in the enhanced ability to promote tumor growth, we conducted whole-transcriptome sequencing analysis in the H1975 cells exposed to PM2.5 for 90 days. A total of 292 genes exhibited differential expression with twofold increases or decreases in the PM2.5-treated H1975 cells. Among the 10 differentially expressed genes with the highest scores, TMPRSS2 is a known oncogene that promotes tumor progression and metastasis in prostate cancer (Stone, 2017; Ko *et al*, 2020) and was recently shown to be activated by PM2.5 exposure (Li *et al*, 2021). Therefore, we examined whether TMPRSS2 may be involved in the enhanced ability to promote tumor growth in lung cancer cells. We confirmed that the expression of TMPRSS2 mRNA and protein was increased in the

PM2.5-treated H1975 cells (Fig 4A and B). As PM2.5 is known to activate the translocation of AhR into the nucleus, the increased expression of TMPRSS2 may be attributed to the binding of activated AhR to the TMPRSS2 promoter. Indeed, we confirmed that the level of AhR was increased in the nucleus of the PM2.5-treated cells (Fig 4C). Furthermore, we showed that the binding of AhR to the TMPRSS2 promoter was enhanced in the PM2.5-treated cells (Fig 4D), suggesting that the upregulation of TMPRSS2 expression is correlated with the enhanced binding of AhR to the promoter of TMPRSS2.

To delineate the role of TMPRSS2 in promoting tumor growth, we examined the effects of TMPRSS2 depletion on tumor growth. As shown in Fig 5, stable depletion of TMPRSS2 in H1975 cells reduced the ability to undergo anchorage-independent growth *in vitro* and slowed tumor growth *in vivo*. Therefore, TMPRSS2-mediated signaling is clearly involved in promoting tumor growth in lung cancers. To systematically explore the effect of TMPRSS2 on lung cancer cells, we used whole-transcriptome analysis to analyze the effects of TMPRSS2 overexpression on gene expression. As shown in Fig EV4, we identified several pathways that were highly enriched in the TMPRSS2-overexpressing H1299 cells, including those connected with immune, cell growth, and proliferation signatures. The immune-associated pathways included coronavirus disease–COVID-19, legionellosis, influenza A, *Yersinia* infection, malaria, NOD-like receptor signaling, and pathogenic *Escherichia coli* infection. The pathways associated with cell growth and proliferation included ribosome and hedgehog signaling. Interestingly, transcriptome sequencing analysis of the PM2.5-treated cells also revealed that PM2.5 affected immune and cell growth and proliferation signatures (Fig EV2). The immune-associated pathways included viral protein interactions with cytokines and cytokine receptors and cytokine–cytokine receptor interactions. The pathways associated with cell growth and proliferation included transcriptional dysregulation in cancer and the hedgehog signaling pathway (Fig EV2). This finding indicates that upregulated TMPRSS2 expression was positively correlated with cell proliferation and immune modulation in lung cancer progression.

COVID-19, which is a global pandemic caused by the infection of the new coronavirus SARS-CoV-2, has a high diagnosis rate in cities with severe air pollution, and the patient's condition is more complicated and serious. PM is associated with the incidence and severity of COVID-19 (Yao *et al*, 2020; Zhu *et al*, 2020). SARS-CoV-2 enters the host cell by binding the spike (S) protein on the surface of the virus to the receptor angiotensin-converting enzyme 2 (ACE2) on the surface of the host cell, and then cleaving the S protein by another receptor protein TMPRSS2 on the surface of the host cell to make SARS-CoV-2 fuse into the host cell membrane, allowing the virus to enter (Hoffmann *et al*, 2020). Exposure to PM 2.5 promoted the upregulation of TMPRSS2 and ACE2 in lung fibroblasts, which in turn increased the infectivity of SARS-CoV-2 and the severity of COVID-19 (Li *et al*, 2021). Our study shows that PM2.5 induces TMPRSS2 expression, which may make people more susceptible to infection with SARS-CoV-2. Therefore, TMPRSS2 appears to play an important role in PM 2.5 causing the more severe effects of COVID-19 and lung cancer.

IL18 was identified as one of the top 10 upregulated genes in the TMPRSS2-overexpressing H1299 cells (Table 2). We confirmed that



**Table 3. Clinical correlation of TMPRSS2 expression with age, sex, nuclear AhR, IL18, and overall stage in 25 lung cancer patients<sup>a</sup>.**

| Characteristics        | TMPRSS2 High <sup>b</sup><br>(N = 17) | TMPRSS2 Low <sup>c</sup><br>(N = 8) | P-value             |
|------------------------|---------------------------------------|-------------------------------------|---------------------|
| Age (years)            |                                       |                                     |                     |
| ≤ 60                   | 4                                     | 2                                   | 1                   |
| > 60                   | 13                                    | 6                                   |                     |
| Gender                 |                                       |                                     |                     |
| Female                 | 11                                    | 1                                   | 0.03 <sup>d</sup>   |
| Male                   | 6                                     | 7                                   |                     |
| Nuclear AhR expression |                                       |                                     |                     |
| High <sup>e</sup>      | 11                                    | 0                                   | 0.0029 <sup>d</sup> |
| Low <sup>f</sup>       | 6                                     | 8                                   |                     |
| IL18 expression        |                                       |                                     |                     |
| High <sup>e</sup>      | 15                                    | 3                                   | 0.0169 <sup>d</sup> |
| Low <sup>f</sup>       | 2                                     | 5                                   |                     |
| Overall stage          |                                       |                                     |                     |
| III–IV                 | 10                                    | 1                                   | 0.04 <sup>d</sup>   |
| I–II                   | 7                                     | 7                                   |                     |

<sup>a</sup>By Fisher's test.<sup>b</sup>High: Representative lung adenocarcinoma with intense TMPRSS2 immunoreactivity (+: score 2,3).<sup>c</sup>Low: Representative lung adenocarcinoma showing no or weak TMPRSS2 immunoreactivity (–: scores 0, 1).<sup>d</sup> $p < 0.05$ .<sup>e</sup>High: Representative lung adenocarcinoma with intense nuclear AhR or IL18 immunoreactivity (+: scores 2, 3).<sup>f</sup>Low: Representative lung adenocarcinoma showing no or weak nuclear AhR or IL18 immunoreactivity (–: scores 0, 1).

cancer cells may affect the formation of inflammasomes to enhance the secretion of IL18. The increased secretion of IL18 may in turn promote cell proliferation, proinflammation, and cancer progression. A recent study indicated that mice with EGFR mutations are more likely to develop cancer after exposure to pollutant particles mediated by an inflammatory protein called interleukin 1 beta, which is part of the body's immune response to PM2.5 exposure (Swanton *et al*, 2022). The role of PM2.5-induced inflammatory response in cancer progression should be further explored.

Finally, the role of TMPRSS2 expression in lung cancer was examined in tumor specimens from patients. A positive correlation was observed between high levels of TMPRSS2 and nuclear AhR (Table 3), confirming that AhR is associated with the expression of TMPRSS2 *in vivo*. Increased TMPRSS2 expression was also positively correlated with the expression of IL18 (Table 3). Interestingly, increased TMPRSS2 expression was positively correlated with advanced stages of lung cancer, supporting our finding that TMPRSS2 plays an important role in tumor progression of lung cancer. Surprisingly, we observed that high expression of TMPRSS2 was found preferentially in female patients (Table 3). At present, we cannot offer any explanation for this finding.

In conclusion, we have shown that long-term exposure to PM2.5 promotes tumor progression in lung cancer. Based on the results presented in this study, we propose a schematic model (Fig 7C) in which the mechanism involved in promoting tumor progression by exposure to PM2.5 may include (i) activation of EGFR signaling and (ii) activation of AhR to upregulate TMPRSS2, which in turn upregulates its downstream targets, such as IL18.

## Materials and Methods

### Reagents and Tools table

| Antibody sources                         | Reference or source | Identifier or catalog number |
|------------------------------------------|---------------------|------------------------------|
| <b>Antibody for Western blot and IHC</b> |                     |                              |
| Rabbit anti-pEGFR                        | Cell Signaling      | #2234                        |
| Rabbit anti-EGFR                         | Cell Signaling      | #4267                        |
| Rabbit anti-pSTAT3                       | Cell Signaling      | #9145                        |
| Rabbit anti-STAT3                        | Cell Signaling      | #4904                        |
| Rabbit anti-pAKT                         | Cell Signaling      | #9271                        |
| Rabbit anti-AKT                          | Santa Cruz          | sc-8312                      |
| Rabbit anti-pERK                         | Cell Signaling      | #9101                        |
| Rabbit anti-ERK                          | Santa Cruz          | sc-94                        |
| Rabbit anti-Ki-67                        | Cell Signaling      | #9027                        |
| Mouse anti-HA                            | Sigma               | H9658                        |
| Mouse anti-TMPRSS2                       | Santa Cruz          | sc-515727                    |
| Rabbit anti-IL-18                        | Cell Signaling      | #67775                       |
| Rabbit anti-Vimentin                     | Cell Signaling      | #5741                        |
| Rabbit anti-AhR                          | GeneTex             | GTX129012                    |
| Goat anti-Lamin B                        | Santa Cruz          | sc-6216                      |

Reagents and Tools table (continued)

| Antibody sources                   | Reference or source                | Identifier or catalog number |
|------------------------------------|------------------------------------|------------------------------|
| Mouse anti- $\beta$ -actin         | Sigma                              | A5441                        |
| <b>Antibody for IP, IHC and IF</b> |                                    |                              |
| Mouse anti-AhR                     | Santa Cruz                         | sc-133088                    |
| Goat anti mouse Alexa®Fluor 488    | Life Technologies Molecular Probes | A111001                      |
| <b>Chemical reagent</b>            |                                    |                              |
| CH-223191                          | MedChemExpress                     | HY-12684                     |
| <b>Sequence-based reagents</b>     |                                    |                              |
| <b>qPCR primers</b>                | <b>Forward (5'-3')</b>             | <b>Reverse (3'-5')</b>       |
| TMPRSS2                            | ACTCTGGAAGTTCATGGGCAG              | TGAAGTTTGGTCCGTAGAGCC        |
| IL-18                              | CTGCCACCTGCTGCAGTCTA               | TCTACTGGTTCAGCAGCCATCTTTA    |
| GAPDH                              | CACTAGGCCGCTCACTGTT CTC            | GCCCAATACGACCAATCC           |

## Methods and Protocols

### Cell lines and culture

A549, H1975, H460, H1299, IMR90, and MRC5 cells were obtained from the American Type Culture Collection (Manassas, VA, USA). The lung cancer cell line PC9 was kindly provided by Dr. Chih-Hsin Yang (National Taiwan University). All of the cells were cultured in RPMI-1640 medium. The short tandem repeat assay was used to confirm the identity of all cell lines. The absence of mycoplasma contamination was tested by a polymerase chain reaction (PCR)-based enzyme-linked immunosorbent assay (ELISA; Sigma).

### Source and preparation of PM2.5

The source of PM2.5 used in this work is the National Institute of Standards and Technology (NIST, USA) particulate matter SRM 1650b and was obtained from Sigma-Aldrich (St. Louis, MO, USA). The major components of this PM2.5 are PAHs and nitro-PAHs. PM2.5 was dissolved in DMSO at 25 mg/ml, sonicated for 30 min, and used within 1 h for the experiments performed (Piao *et al*, 2018). The PM2.5 was diluted 100-fold with double-distilled water, and the average diameter was measured by a laser-scattering method (Nano ZS90, Malvern). The diameter of the prepared PM 2.5 measured was  $992 \pm 157.2$  nm.

### Reagents

Culture media and chemical compounds were purchased from Life Technologies (Grand Island, NY, USA). Antibodies against phosphor (P)-EGFR (1:1,000), EGFR (1:1,000), pSTAT3 (1:1,000), STAT3 (1:1,000), pAKT (1:1,000), pERK (1:1,000), IL-18 (1:200), vimentin (1:1,000), and Ki-67 (1:1,000) were purchased from Cell Signaling (Temecula, CA, USA). Anti-AKT (1:1,000), anti-ERK (1:1,000), anti-TMPRSS2 (1:500), anti-AhR (1:500), and anti-Lamin B (1:1,000) were obtained from Santa Cruz Biotechnology (Santa Cruz, CA, USA). The antibody against AhR (1:500) was purchased from GeneTex (Irvine, CA, USA). The antibody against  $\beta$ -actin (1:1,000) and HA (1:1,000) was purchased from Sigma (St. Louis, MO, USA). Alexa Fluor® 488 goat anti-mouse IgG (1:1,000) was purchased from Life Technologies (Waltham, MA, USA). CH223191 was purchased from Sigma (St. Louis, MO, USA).

### Plasmids and establishment of stable knockdown subclones

Full-length TMPRSS2 with HA tagged at the C-terminus was cloned into the pcDNA3.1 vector using NotI and XbaI restriction enzymes (TMPRSS2-HA). Plasmid DNAs were transfected into cells using Lipofectamine 2000 (Invitrogen, Waltham, Massachusetts, USA) according to the manufacturer's protocol. Packed lentiviruses expressing short hairpin RNA (shRNAs) designed to knock down the expression of TMPRSS2 (TRCN0000000265 and TRCN0000000266) were obtained from the RNA interference consortium (National RNAi Core Facility, Academia Sinica, Taipei, Taiwan). The stable knockdown H1975 cells were designated shTMPRSS2-1 and shTMPRSS2-2, while the control was named the vector (control).

### Whole-transcriptome sequencing and functional enrichment analysis

Total RNA was extracted from H1975/H1975-PM 2.5 cells treated for 90 days and H1299/H1299 cells overexpressing TMPRSS2 using TRIzol® Reagent (Invitrogen, USA). Whole-transcriptome sequencing and functional enrichment analysis were performed as described in a previous study (Leu *et al*, 2020). The RNA-sequencing data generated in this study have been deposited in the Gene Expression Omnibus under the accession GSE220252 and GSE220306.

### Assays for cell viability and anchorage-independent growth

Viable cell counts by trypan blue exclusion assays and anchorage-independent growth by soft agar colony formation assays were performed as described previously (Chen *et al*, 2009, 2016).

### Chromatin immunoprecipitation-qPCR

Chromatin immunoprecipitation assays were performed using an Immunoprecipitation Assay Kit (Merck Millipore, Temecula, CA) according to the manufacturer's instructions. Each of the purified DNAs (10 pg) was used as a template for qPCR via five primers across potential TMPRSS2 regulatory regions (Leach *et al*, 2021): RG1a: (F)CCTTGCAATTGCTGACCCCA, (R)ACAGCAAGATGGCTTTGAAGT; RG1d: (F)CATGAGGGCAGTGAGAGTGC, (R)TTTCTCTGGTCCCAGCCATC; RG1f: (F)TTACACCACTGGCTATTGGCTC, (R)CTTTTCAGCCTTGGACATCGG; RG1h: (F)CCAAAAGTGTGCTCGG

CTT, (R)AGAAGTGCAGCTGGCATCG; RG2a: (F)GCAACCTGAGCCTGTTGACT, (R)CTCAGGTCAGGCTCCACAC.

### RT-PCR, Western blotting, and immunofluorescence staining

The cell lysate for analysis by RT-PCR and Western blotting was performed as described previously (Chen *et al*, 2013; Wang *et al*, 2017). The immunofluorescence staining of cells and tumor sections was performed as described previously (Wang *et al*, 2017).

### In vivo tumor xenograft study

The detailed procedure for tumor xenografts study was performed as previously described (Chen *et al*, 2018). Six-week-old nude BALB/c nu/nu male mice (the National Laboratory Animal Center, Taipei, Taiwan) were used in this work and the experiments were performed in accordance with the guidelines for the Animal Care Ethics Commission of Chang Gung Memorial Hospital (IACUC approval number: 2019032009 and 2020121704) and Chang Gung University (IACUC approval number: CGU110-100) and under an approved animal protocol. All mice were housed under specific pathogen-free conditions and maintained at  $23 \pm 1^\circ\text{C}$  with a 12 h dark/light cycle. All mice had free access to standard autoclaved food and water for the duration of the study.

### Tumor specimens

Tumor and corresponding noncancerous normal tissues were collected from 25 lung cancer patients who underwent surgical resection at Chang Gung Memorial Hospital (Tao-Yuan, Taiwan, ROC) between 2013 and 2017. This study was reviewed and approved by the Institutional Review Board and Ethics Committee of Chang Gung Memorial Hospital (IRB No.: 202102073B0C501). Written informed consent was obtained from all patients. The experiments conformed to the principles set out in the WMA Declaration of Helsinki and the Department of Health and Human Services Belmont Report.

### Immunohistochemistry (IHC)

Immunohistochemistry was performed as described previously (Jan *et al*, 2011). The scoring of IHC staining results was performed by two expert pathologists blinded to the clinical details. Immunoreactivity was classified into four classes: scored 0 for undetectable staining, scored 1 for weak staining, scored 2 for low intensity, and scored 3 for high intensity.

### Statistical analysis

The presented results were representative of three independent experiments with similar results. Data in this study all followed normal distribution tested by Shapiro–Wilk test ( $P > 0.05$ ). One-sample *t*-test was used to test whether relative phosphor protein expression, relative RNA expression, relative protein expression, relative proliferation of experiment group, and relative colony formation ability under null hypotheses mean equal to 1. To compare differences in proliferation, tumor weight, and tumor volume on the last observation day between treated group and control group, the variance equality between the two groups was examined by *F*-test, and a further two-sample *t*-test with or without equal variance was applied. For the comparison of fold change of AhR binding to different TMPRSS2 promoter regions, the Levene's test was used first for evaluating homogeneity of variance across

### The paper explained

#### Problem

Particulate matter 2.5 (PM2.5) is a known risk factor for lung cancer; however, the molecular mechanisms triggered by exposure to PM2.5 and affecting cancer progression are unclear.

#### Results

In this study, lung cancer cells exposed to PM2.5 for 90 days were used as a cellular model of the effects of long-term exposure to PM2.5 on lung cancer. In mice, tumor progression was enhanced by long-term exposure to PM2.5. The molecular mechanism identified may include (i) activation of EGFR signaling and (ii) activation of AhR to upregulate TMPRSS2, which in turn upregulates its downstream targets, such as IL18.

#### Impact

Long-term exposure to PM2.5 could promote tumor progression in lung cancer through activation of EGFR and AhR to enhance the TMPRSS2-IL18 pathway.

promoter regions. If *P*-value of Levene's test  $> 0.05$ , the one-way analysis of variance (ANOVA) with *post hoc* analysis (Tukey's multiple-comparison test) was applied to compare differences between three groups (RG1a, RG1d, and RG1f). Otherwise, Welch's ANOVA and Games–Howell test of *post hoc* analysis was used (RG1h, RG2a). To assess relative cell ability among different cell lines (A549, IMR90, MRC5, and H1975) and PM2.5 concentration, the two-way ANOVA and Tukey's multiple-comparisons test of *post hoc* analysis were used. The two-way repeated-measurement ANOVA was used to evaluate treated effects over time on tumor volume, and pairwise comparison of *post hoc* analysis with Benjamini–Hochberg (BH) correction was conducted to the evaluated treated effect of PM2.5 on tumor volume in different time points. If multiple statistical tests were conducted in one experiment, BH method for adjusting multiple hypothesis testing was done. All tests were two tails and *P*-value  $< 0.05$  was considered statistically significant. The scoring of IHC staining results was done in a blinded fashion by two pathologists.

## Data availability

RNA sequencing data generated in this study have been deposited at the Gene Expression Omnibus under the following accession code GSE220252 (<https://www.ncbi.nlm.nih.gov/geo/query/acc.cgi?acc=GSE220252>) and GSE220306 (<https://www.ncbi.nlm.nih.gov/geo/query/acc.cgi?acc=GSE220306>).

**Expanded View** for this article is available [online](#).

## Acknowledgements

This work was supported by grants from Chang Gung Memorial Hospital (CMRPF1M0051 and CMRPF1M0052 to CYC), Ministry of Science and Technology of Taiwan (MOST 111-2320-B-255-003 to CYC), and the National Science and Technology Council (NTSC111-2314-B-002-150- to PCY). We would like to thank Jang-Hau Lian and Genomic Medicine Core Laboratory at the Chang Gung Memorial Hospital for technical assistance.

## Author contributions

**Tong-Hong Wang:** Data curation; software; visualization; methodology; writing – original draft. **Kuo-Yen Huang:** Data curation; visualization; methodology; writing – original draft. **Chin-Chuan Chen:** Data curation; formal analysis. **Ya-Hsuan Chang:** Formal analysis. **Hsuan-Yu Chen:** Formal analysis. **Chuen Hsueh:** Data curation; software. **Yi-Tsen Liu:** Data curation; formal analysis. **Shuenn-Chen Yang:** Data curation; formal analysis. **Pan-Chyr Yang:** Conceptualization; data curation; supervision; visualization; writing – review and editing. **Chi-Yuan Chen:** Supervision; funding acquisition; writing – original draft; project administration; writing – review and editing.

## Disclosure and competing interests statement

The authors declare that they have no conflict of interest.

## References

- Al-Hamdan AZ, Albashaireh RN, Al-Hamdan MZ, Crosson WL (2017) The association of remotely sensed outdoor fine particulate matter with cancer incidence of respiratory system in the USA. *J Environ Sci Health A Tox Hazard Subst Environ Eng* 52: 547–554
- Bazyar J, Pourvakhshoori N, Khankeh H, Farrokhi M, Delshad V, Rajabi E (2019) A comprehensive evaluation of the association between ambient air pollution and adverse health outcomes of major organ systems: a systematic review with a worldwide approach. *Environ Sci Pollut Res Int* 26: 12648–12661
- Cao W, Feng Q, Wang X (2021) Computational analysis of TMPRSS2 expression in normal and SARS-CoV-2-infected human tissues. *Chem Biol Interact* 346: 109583
- Chen CY, Chiou SH, Huang CY, Jan CI, Lin SC, Hu WY, Chou SH, Liu CJ, Lo JF (2009) Tid1 functions as a tumour suppressor in head and neck squamous cell carcinoma. *J Pathol* 219: 347–355
- Chen CY, Jan CI, Lo JF, Yang SC, Chang YL, Pan SH, Wang WL, Hong TM, Yang PC (2013) Tid1-L inhibits EGFR signaling in lung adenocarcinoma by enhancing EGFR Ubiquitinylation and degradation. *Cancer Res* 73: 4009–4019
- Chen CY, Jan CI, Pi WC, Wang WL, Yang PC, Wang TH, Karni R, Wang TC (2016) Heterogeneous nuclear ribonucleoproteins A1 and A2 modulate expression of Tid1 isoforms and EGFR signaling in non-small cell lung cancer. *Oncotarget* 7: 16760–16772
- Chen CY, Chen CC, Shieh TM, Hsueh C, Wang SH, Leu YL, Lian JH, Wang TH (2018) Corylin suppresses hepatocellular carcinoma progression via the inhibition of epithelial-mesenchymal transition, mediated by long noncoding RNA GAS5. *Int J Mol Sci* 19: 380
- Chen YJ, Roumeliotis TI, Chang YH, Chen CT, Han CL, Lin MH, Chen HW, Chang GC, Chang YL, Wu CT et al (2020) Proteogenomics of non-smoking lung cancer in East Asia delineates molecular signatures of pathogenesis and progression. *Cell* 182: e217
- Harrison RM, Yin J (2000) Particulate matter in the atmosphere: which particle properties are important for its effects on health? *Sci Total Environ* 249: 85–101
- Henkler F, Stolpmann K, Luch A (2012) Exposure to polycyclic aromatic hydrocarbons: bulky DNA adducts and cellular responses. *Exp Suppl* 101: 107–131
- Hoffmann M, Kleine-Weber H, Schroeder S, Kruger N, Herrler T, Erichsen S, Schiergens TS, Herrler G, Wu NH, Nitsche A et al (2020) SARS-CoV-2 cell entry depends on ACE2 and TMPRSS2 and is blocked by a clinically proven protease inhibitor. *Cell* 181: e278
- Jan CI, Yu CC, Hung MC, Harn HJ, Nieh S, Lee HS, Lou MA, Wu YC, Chen CY, Huang CY et al (2011) Tid1, CHIP and ErbB2 interactions and their prognostic implications for breast cancer patients. *J Pathol* 225: 424–437
- Javed W, Iakovides M, Stephanou EG, Wolfson JM, Koutrakis P, Guo B (2019) Concentrations of aliphatic and polycyclic aromatic hydrocarbons in ambient PM<sub>2.5</sub> and PM<sub>10</sub> particulates in Doha, Qatar. *J Air Waste Manag Assoc* 69: 162–177
- Jeong S, Park SA, Park I, Kim P, Cho NH, Hyun JW, Hyun YM (2019) PM<sub>2.5</sub> exposure in the respiratory system induces distinct inflammatory signaling in the lung and the liver of mice. *J Immunol Res* 2019: 3486841
- Karki R, Man SM, Kanneganti TD (2017) Inflammasomes and cancer. *Cancer Immunol Res* 5: 94–99
- Ko CJ, Hsu TW, Wu SR, Lan SW, Hsiao TF, Lin HY, Lin HH, Tu HF, Lee CF, Huang CC et al (2020) Inhibition of TMPRSS2 by HAI-2 reduces prostate cancer cell invasion and metastasis. *Oncogene* 39: 5950–5963
- Leach DA, Mohr A, Giotis ES, Cil E, Isac AM, Yates LL, Barclay WS, Zwacka RM, Bevan CL, Brooke GN (2021) The antiandrogen enzalutamide downregulates TMPRSS2 and reduces cellular entry of SARS-CoV-2 in human lung cells. *Nat Commun* 12: 4068
- Leu YL, Wang TH, Wu CC, Huang KY, Jiang YW, Hsu YC, Chen CY (2020) Hydroxygenkwanin suppresses non-small cell lung cancer progression by enhancing EGFR degradation. *Molecules* 25: 941
- Li HH, Liu CC, Hsu TW, Lin JH, Hsu JW, Li AF, Yeh YC, Hung SC, Hsu HS (2021) Upregulation of ACE2 and TMPRSS2 by particulate matter and idiopathic pulmonary fibrosis: a potential role in severe COVID-19. *Part Fibre Toxicol* 18: 11
- Martin CE, List K (2019) Cell surface-anchored serine proteases in cancer progression and metastasis. *Cancer Metastasis Rev* 38: 357–387
- Pérez Velasco R, Jarosińska D (2022) Update of the WHO global air quality guidelines: systematic reviews – an introduction. *Environ Int* 170: 107556
- Piao MJ, Ahn MJ, Kang KA, Ryu YS, Hyun YJ, Shilnikova K, Zhen AX, Jeong JW, Choi YH, Kang HK et al (2018) Particulate matter 2.5 damages skin cells by inducing oxidative stress, subcellular organelle dysfunction, and apoptosis. *Arch Toxicol* 92: 2077–2091
- Pun VC, Kazemiparkouhi F, Manjourides J, Suh HH (2017) Long-term PM<sub>2.5</sub> exposure and respiratory, cancer, and cardiovascular mortality in older US adults. *Am J Epidemiol* 186: 961–969
- Romagnolo DF, Degner SC, Selmin O (2010) Aryl hydrocarbon receptor-mediated carcinogenesis and modulation by dietary xenobiotic and natural ligands. In *Bioactive Compounds and Cancer*, Milner JA, Romagnolo DF (eds), pp 761–782. Berlin: Springer
- Schneider MA, Richtmann S, Grunding AR, Wrenger S, Welte T, Meister M, Kriegsmann M, Winter H, Muley T, Janciauskiene S (2022) Transmembrane serine protease 2 is a prognostic factor for lung adenocarcinoma. *Int J Oncol* 60: 39
- Sicard P, Khaniabadi YO, Perez S, Gualtieri M, De Marco A (2019) Effect of O<sub>3</sub>, PM<sub>10</sub> and PM<sub>2.5</sub> on cardiovascular and respiratory diseases in cities of France, Iran and Italy. *Environ Sci Pollut Res Int* 26: 32645–32665
- Singh A, Kamal R, Ahamed I, Wagh M, Bihari V, Sathian B, Kesavachandran CN (2018) PAH exposure-associated lung cancer: an updated meta-analysis. *Occup Med (Lond)* 68: 255–261
- Stone L (2017) Prostate cancer: mastering transcription: TMPRSS2-ERG and the cis-regulatory landscape. *Nat Rev Urol* 14: 579
- Swanton C, Hill W, Lim E, Lee C, Weeden C, Augustine M, Chen K, Kuan F, Marongiu F, Rodrigues F et al (2022) LBA1 mechanism of action and an actionable inflammatory axis for air pollution induced non-small cell lung cancer: towards molecular cancer prevention. *Ann Oncol* 33: S1413
- Tsay JJ, Tchou-Wong KM, Greenberg AK, Pass H, Rom WN (2013) Aryl hydrocarbon receptor and lung cancer. *Anticancer Res* 33: 1247–1256

- Tseng CH, Tsuang BJ, Chiang CJ, Ku KC, Tseng JS, Yang TY, Hsu KH, Chen KC, Yu SL, Lee WC et al (2019) The relationship between air pollution and lung cancer in nonsmokers in Taiwan. *J Thorac Oncol* 14: 784–792
- Tumbrink HL, Heimsoeth A, Sos ML (2021) The next tier of EGFR resistance mutations in lung cancer. *Oncogene* 40: 1–11
- Wang TH, Lin YH, Yang SC, Chang PC, Wang TC, Chen CY (2017) Tid1-S regulates the mitochondrial localization of EGFR in non-small cell lung carcinoma. *Oncogenesis* 6: e361
- Wang Y, Zhong Y, Hou T, Liao J, Zhang C, Sun C, Wang G (2019) PM2.5 induces EMT and promotes CSC properties by activating notch pathway *in vivo* and *in vitro*. *Ecotoxicol Environ Saf* 178: 159–167
- Wang Q, Li L, Qu T, Li J, Wu L, Li K, Wang Z, Zhu M, Huang B, Wu W et al (2021) High expression of ACE2 and TMPRSS2 at the resection margin makes lung cancer survivors susceptible to SARS-CoV-2 with unfavorable prognosis. *Front Oncol* 11: 644575
- Watzky M, de Dieuleveult M, Letessier A, Saint-Ruf C, Miotto B (2021) Assessing the consequences of environmental exposures on the expression of the human receptor and proteases involved in SARS-CoV-2 cell-entry. *Environ Res* 195: 110317
- Xing YF, Xu YH, Shi MH, Lian YX (2016) The impact of PM2.5 on the human respiratory system. *J Thorac Dis* 8: E69–E74
- Yao L, LiangLiang C, JinYue L, WanMei S, Lili S, YiFan L, HuaiChen L (2019) Ambient air pollution exposures and risk of drug-resistant tuberculosis. *Environ Int* 124: 161–169
- Yao Y, Pan J, Liu Z, Meng X, Wang W, Kan H, Wang W (2020) Temporal association between particulate matter pollution and case fatality rate of COVID-19 in Wuhan. *Environ Res* 189: 109941
- Zhu Y, Xie J, Huang F, Cao L (2020) Association between short-term exposure to air pollution and COVID-19 infection: evidence from China. *Sci Total Environ* 727: 138704
- Zitvogel L, Kepp O, Galluzzi L, Kroemer G (2012) Inflammasomes in carcinogenesis and anticancer immune responses. *Nat Immunol* 13: 343–351

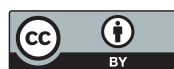

**License:** This is an open access article under the terms of the [Creative Commons Attribution](#) License, which permits use, distribution and reproduction in any medium, provided the original work is properly cited.



## Expanded View Figures

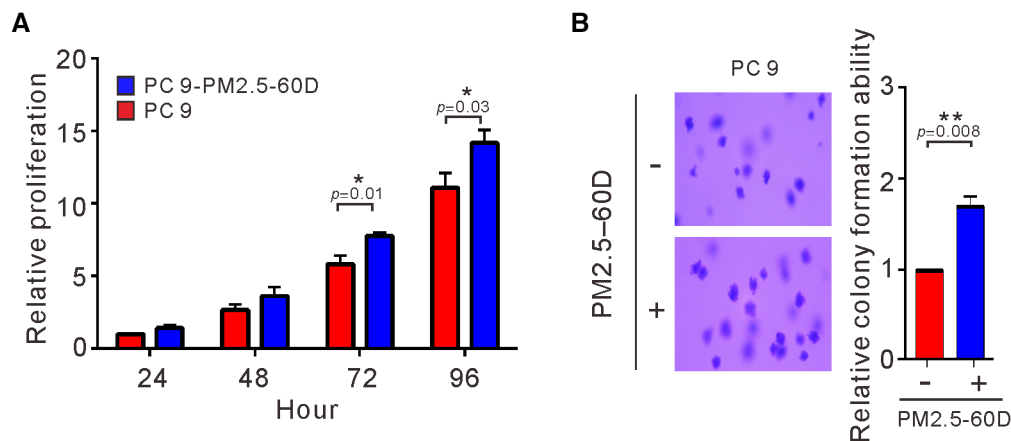

**Figure EV1. Effects of long-term exposure to PM2.5 on cell proliferation and anchorage-independent growth of PC9 lung cancer cells.**

A, B PC9 cells were treated with PM2.5 at 50  $\mu\text{g}/\text{ml}$  for 60 days. The proliferation of treated cells was assessed by Trypan blue assay (A). The anchorage-independent growth was assessed by a soft agar colony formation assay (B). The data shown are the means  $\pm$  SDs from three independent experiments. \* $P < 0.05$  and \*\* $P < 0.01$ , compared with untreated cells. (A)  $P$ -values were determined by two-sample  $t$ -test. (B)  $P$ -values were determined by one-sample  $t$ -test.

Source data are available online for this figure.

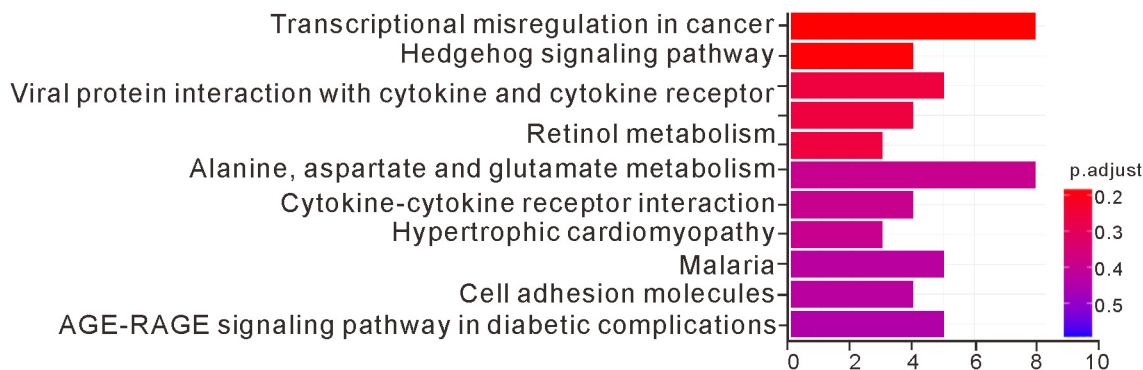

**Figure EV2. The top 10 enriched biological processes in long-term exposure to PM2.5.**

H1975 cells were exposed to 50  $\mu\text{g}/\text{ml}$  PM2.5 for 90 days, and total RNA was subjected to whole-transcriptome analysis as described in the Materials and Methods. Functional classification of the differentially expressed genes in PM2.5-treated H1975 cells, as assessed using ingenuity pathway analysis.

Source data are available online for this figure.

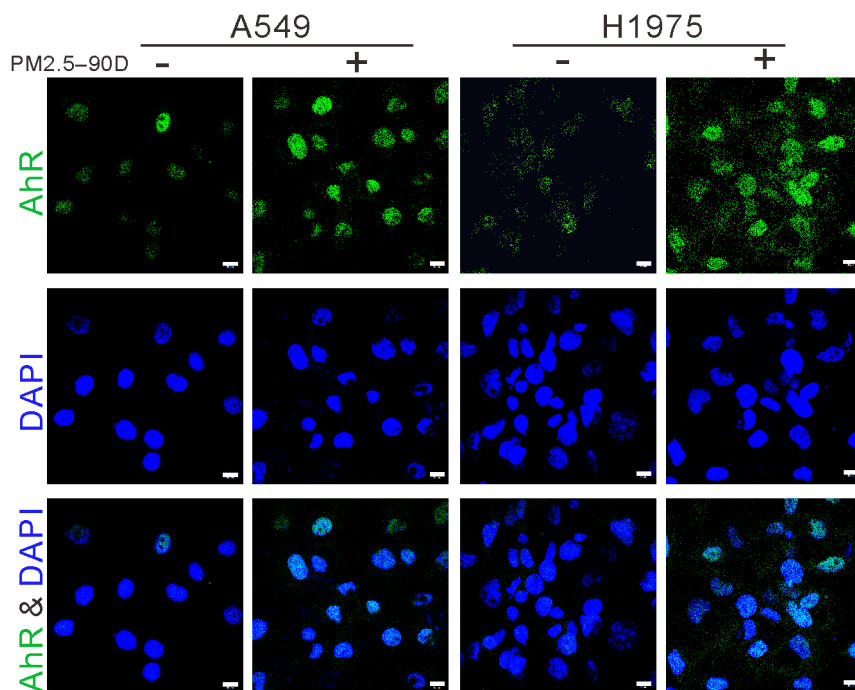

**Figure EV3. Immunofluorescence staining of AhR.**

The subcellular distribution of AhR was assessed by immunofluorescence staining in H1975 and A549 cells treated with 50 µg/ml PM2.5 for 90 days. DAPI was used as a nuclear stain. Scale bar: 10 µm.

Source data are available online for this figure.

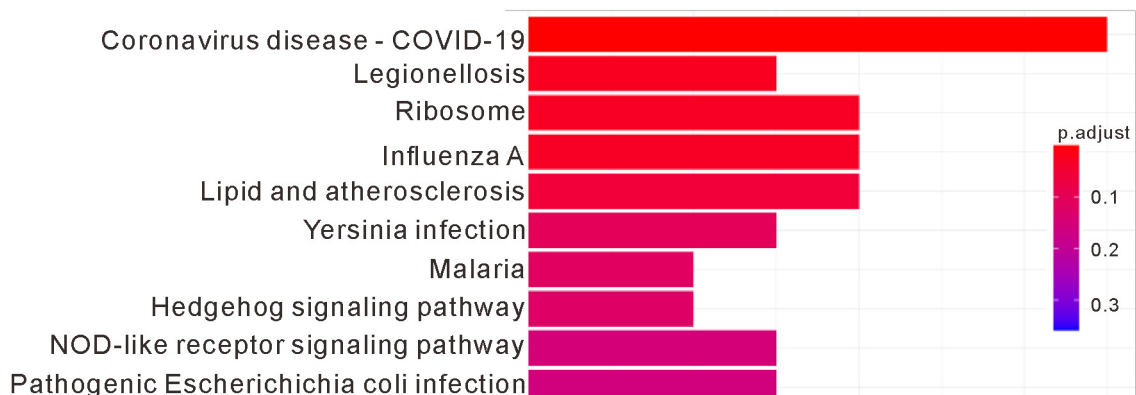

**Figure EV4. The top 10 enriched biological processes in TMPRSS2 overexpression.**

H1299 cells were transfected with TMPRSS2-HA or the empty vector (Vector). After 48 h, the transfected cells were subjected to whole-transcriptome analysis. Functional classification of the differentially expressed genes in TMPRSS2-overexpressing H1299 cells, as assessed using ingenuity pathway analysis.

Source data are available online for this figure.

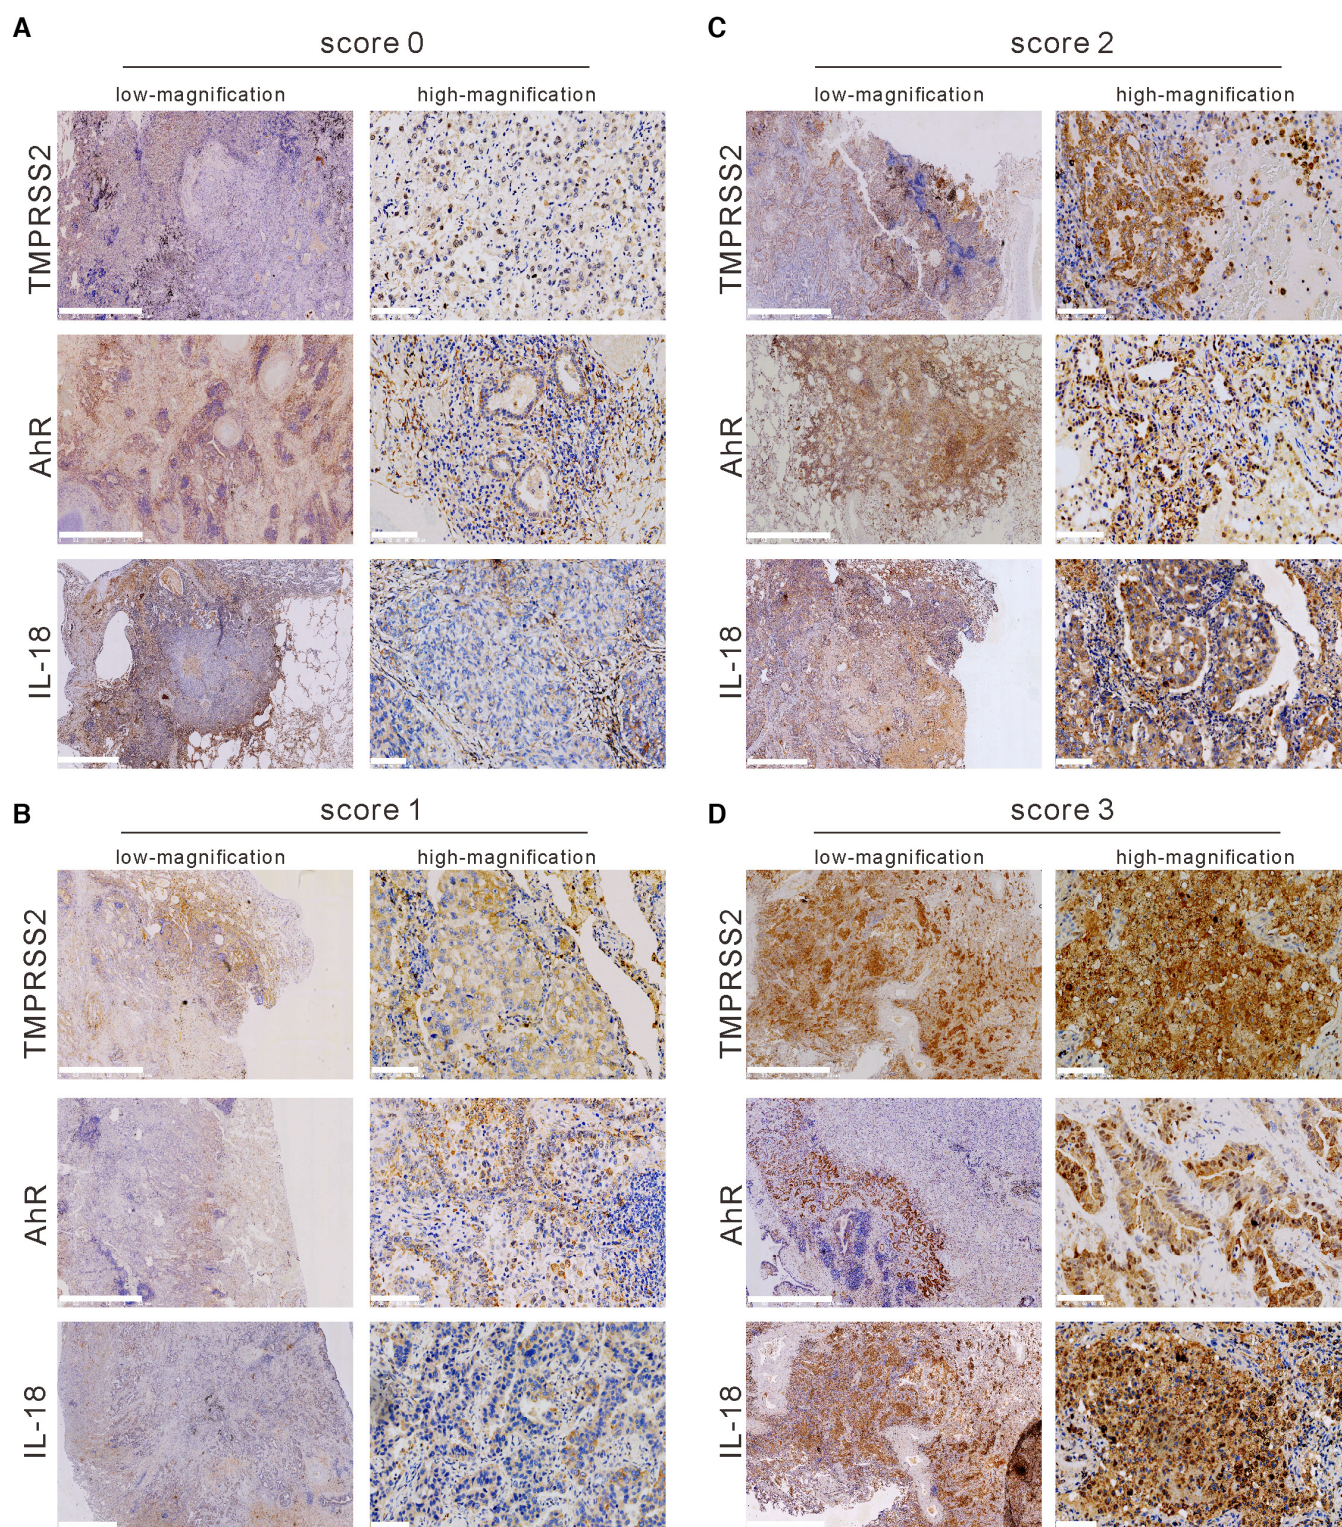

**Figure EV5. Representative IHC staining images showing immunoreactivity.**

A–D (A) Score 0, (B) score 1, (C) score 2, and (D) score 3 of TMPRSS2, IL18, and AhR in lung cancer tissue. Scale bars, 2.5 mm (low magnification) and 100  $\mu$ m (high magnification).

Source data are available online for this figure.
